# Supplementary material for: Prospecting for Novel Plant-Derived Molecules of Rauvolfia serpentina as Inhibitors of Aldose Reductase, a Potent Drug Target for Diabetes and Its Complications
Source: PubMed Central journal article supplement (PMC3629236; doi:10.1371/journal.pone.0061327), 2013-04-17
Supplement: pone.0061327.s003.pdf [file pone.0061327.s003.pdf]

**Table S1. A structured dataset of *R. serpentina* PDMs.** This PDM dataset have 147 compounds and additional details including chemical name, plant part, IUPAC name and 2D structure.

| PDM_ID              | PDM_NAME  | PLANT PART                              | IUPAC                                                                                                                                                                                    | STRUCTURE                                                                                                                                                                                                                                                                                                                                                                                              |
|---------------------|-----------|-----------------------------------------|------------------------------------------------------------------------------------------------------------------------------------------------------------------------------------------|--------------------------------------------------------------------------------------------------------------------------------------------------------------------------------------------------------------------------------------------------------------------------------------------------------------------------------------------------------------------------------------------------------|
| RASE0001<br>[1,3]   | Reserpine | Stem,<br>Leaves,<br>Roots, Root<br>bark | (1R,15S,17R,18R,19S,20S)-6,18-dimethoxy-17-(3,4,5-trimethoxybenzoyl)oxy-1,3,11,12,14,15,16,17,18,19,20,21-dodecahydrohimbans-19-carboxylate                                              | 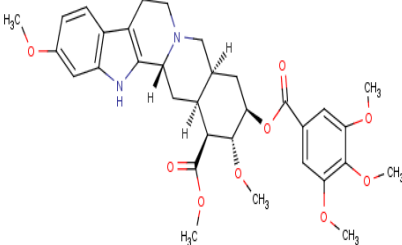 <p>The structure of Reserpine is a complex pentacyclic alkaloid. It features a central bicyclic core with a nitrogen atom. Attached to this core are a 6-methoxyphenyl group, a 17-(3,4,5-trimethoxybenzoyl)oxy group, and a 19-carboxylate group. The stereochemistry is defined as (1R,15S,17R,18R,19S,20S).</p> |
| RASE0002<br>[2,4,5] | Ajmaline  | Stem,<br>Leaves,<br>Roots, Root<br>bark | (1R,9R,10S,13R,14R,16S,18S)-13-ethyl-8-methyl-8,15-diazahexacyclo[14.2.1.0 <sup>1,9</sup> .0 <sup>2,7</sup> .0 <sup>10,15</sup> .0 <sup>12,17</sup> ]nonadeca-2(7),3,5-triene-14,18-diol |  <p>The structure of Ajmaline is a complex hexacyclic alkaloid. It features a central bicyclic core with two nitrogen atoms. Attached to this core are an ethyl group, a methyl group, and two hydroxyl groups. The stereochemistry is defined as (1R,9R,10S,13R,14R,16S,18S).</p>                                 |

|                              |                    |                                                   |                                                                                                                                                                     |                                                                                                                                                                                                                                                                                                                                                                                                                  |
|------------------------------|--------------------|---------------------------------------------------|---------------------------------------------------------------------------------------------------------------------------------------------------------------------|------------------------------------------------------------------------------------------------------------------------------------------------------------------------------------------------------------------------------------------------------------------------------------------------------------------------------------------------------------------------------------------------------------------|
| <p>RASE0003</p> <p>[6]</p>   | <p>Isoajmaline</p> | <p>Stem,<br/>Leaves,<br/>Roots, Root<br/>bark</p> | <p>13-ethyl-8-methyl-8,15-diazahexacyclo[14.2.1.0<sup>{1,9}</sup>.0<sup>{2,7}</sup>.0<sup>{10,15}</sup>.0<sup>{12,17}</sup>]nonadeca-2(7),3,5-triene-14,18-diol</p> | 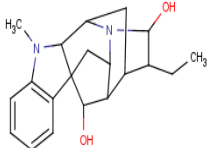 <p>The structure shows a complex polycyclic system with two nitrogen atoms. One nitrogen is substituted with a methyl group (H<sub>3</sub>C) and the other with a phenyl ring. There are two hydroxyl groups (OH) and an ethyl group (CH<sub>2</sub>CH<sub>3</sub>) attached to the ring system.</p>                         |
| <p>RASE0004</p> <p>[6]</p>   | <p>Neoajmaline</p> | <p>Stem,<br/>Leaves,<br/>Roots, Root<br/>bark</p> | <p>3-Ethyl-4,8-dihydroxy-13-methyl-5-propyl-1,3,4,7,8,13,13a,13b-octahydro-2H,6H-2,7-cyclo-6,8a-methano-pyrido[1',2':1,2]azepino[3,4-b]indol-5-ium</p>              |  <p>The structure features a fused ring system including a pyridine ring, an indole ring, and a methanopyridine ring. It has a methyl group (CH<sub>3</sub>) on the pyridine ring, a propyl group (CH<sub>2</sub>CH<sub>2</sub>CH<sub>3</sub>) on the methanopyridine ring, and a hydroxyl group (OH) on the indole ring.</p> |
| <p>RASE0005</p> <p>[2,7]</p> | <p>Ajmalicine</p>  | <p>Stem,<br/>Leaves,<br/>Roots, Root<br/>bark</p> | <p>(19<math>\alpha</math>)-16,17-didehydro- 19-methyloxayohimban- 16-carboxylic acid methyl ester</p>                                                               |  <p>The structure is a complex polycyclic alkaloid with a methyloxayohimban core. It features a methyl group (CH<sub>3</sub>) and a methyl ester group (COOCH<sub>3</sub>) attached to the ring system.</p>                                                                                                                  |

|                            |                    |                                                   |                                                                                                                                                                                                                |                                                                                      |
|----------------------------|--------------------|---------------------------------------------------|----------------------------------------------------------------------------------------------------------------------------------------------------------------------------------------------------------------|--------------------------------------------------------------------------------------|
| <p>RASE0006</p> <p>[6]</p> | <p>Raubasine</p>   | <p>Stem,<br/>Leaves,<br/>Roots, Root<br/>bark</p> | <p>Methyl (1S,15R,16S,20S)-16-methyl-17-oxa-3,13-diazapentacyclo[11.8.0.0<sup>2,10</sup>.0<sup>4,9</sup>.0<sup>15,20</sup>]]henicosa-2(10),4,6,8,18-pentaene-19-carboxylate</p>                                | 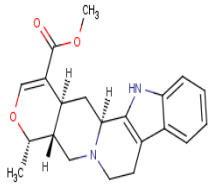  |
| <p>RASE0007</p> <p>[7]</p> | <p>Yohimbine</p>   | <p>Stem,<br/>Leaves,<br/>Roots, Root<br/>bark</p> | <p>(1S,15R,18S,19R,20S)-18-hydroxy-1,3,11,12,14,15,16,17,18,19,20,21-dodecahydroyohimban-19-carboxylate</p>                                                                                                    |   |
| <p>RASE0008</p> <p>[3]</p> | <p>Deserpidine</p> | <p>Stem,<br/>Leaves,<br/>Roots, Root<br/>bark</p> | <p>Methyl (1R,15S,17R,18R,19S,20S)-18-methoxy-17-(3,4,5-trimethoxybenzoyloxy)-3,13-diazapentacyclo[11.8.0.0<sup>2,10</sup>.0<sup>4,9</sup>.0<sup>15,20</sup>]]henicosa-2(10),4,6,8-tetraene-19-carboxylate</p> |  |

|                              |                     |                                                   |                                                                                                                                                                                                                                                                                        |                                                                                      |
|------------------------------|---------------------|---------------------------------------------------|----------------------------------------------------------------------------------------------------------------------------------------------------------------------------------------------------------------------------------------------------------------------------------------|--------------------------------------------------------------------------------------|
| <p>RASE0009</p> <p>[6,7]</p> | <p>Rescinnamine</p> | <p>Stem,<br/>Leaves,<br/>Roots, Root<br/>bark</p> | <p>Methyl (1R,15S,17R,18R,19S,20S)-6,18-dimethoxy-17-[(2E)-3-(3,4,5-trimethoxyphenyl)prop-2-enoyl]oxy}-3,13-diazapentacyclo[11.8.0.0<sup>2,10</sup>.0<sup>4,9</sup>.0<sup>15,20</sup>]]henicosa-2(10),4(9),5,7-tetraene-19-carboxylate</p>                                             | 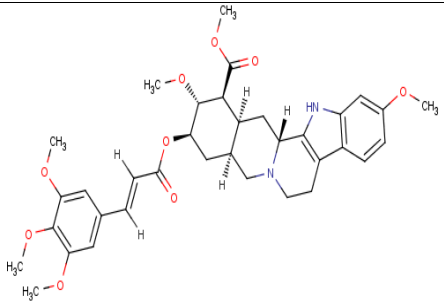  |
| <p>RASE0010</p> <p>[6]</p>   | <p>Serpentinine</p> | <p>Stem,<br/>Leaves,<br/>Roots, Root<br/>bark</p> | <p>11-{2-[(3Z)-3-ethylidene-1H,2H,3H,4H,6H,7H,12H,12bH-indolo[2,3-a]quinolizin-2-yl]-3-methoxy-3-oxopropyl}-19-(methoxycarbonyl)-16-methyl-17-oxa-3,13-diazapentacyclo[11.8.0.0<sup>2,10</sup>.0<sup>4,9</sup>.0<sup>15,20</sup>]]henicosa-1(13),2(10),4,6,8,11,18-heptaen-13-ylum</p> |   |
| <p>RASE0011</p> <p>[8]</p>   | <p>Corynanthine</p> | <p>Stem,<br/>Leaves,<br/>Roots, Root<br/>bark</p> | <p>Methyl (1S,15R,18S,19S,20S)-18-hydroxy-3,13-diazapentacyclo[11.8.0.0<sup>2,10</sup>.0<sup>4,9</sup>.0<sup>15,20</sup>]]henicosa-2(10),4,6,8-tetraene-19-carboxylate</p>                                                                                                             |  |

|                               |                   |                                                   |                                                                                                                                                                                                            |                                                                                       |
|-------------------------------|-------------------|---------------------------------------------------|------------------------------------------------------------------------------------------------------------------------------------------------------------------------------------------------------------|---------------------------------------------------------------------------------------|
| <p>RASE0012</p> <p>[8]</p>    | <p>Papaverine</p> | <p>Stem,<br/>Leaves,<br/>Roots, Root<br/>bark</p> | <p>1-[(3,4-dimethoxyphenyl)methyl]-6,7-dimethoxyisoquinoline</p>                                                                                                                                           | 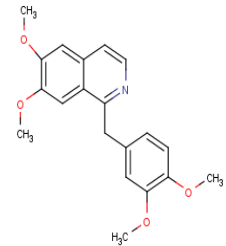   |
| <p>RASE0013</p> <p>[4]</p>    | <p>Sarpagine</p>  | <p>Stem,<br/>Leaves,<br/>Roots, Root<br/>bark</p> | <p>(1S,12S,13R,14S,15E)-15-ethylidene-13-(hydroxymethyl)-3,17-diazapentacyclo[12.3.1.0<sup>2,10</sup>.0<sup>4,9</sup>.0<sup>12,17</sup>]octadeca-2(10),4(9),5,7-tetraen-7-ol</p>                           |    |
| <p>RASE0014</p> <p>[9,10]</p> | <p>Serpentine</p> | <p>Stem,<br/>Leaves,<br/>Roots, Root<br/>bark</p> | <p>(15R,16S,20S)-19-(methoxycarbonyl)-16-methyl-17-oxa-3,13<sup>1</sup>{5}-diazapentacyclo[11.8.0.0<sup>2,10</sup>.0<sup>4,9</sup>.0<sup>15,20</sup>]heneicosa-1(13),2(10),4,6,8,11,18-heptaen-13-ylum</p> |   |
| <p>RASE0015</p> <p>[8]</p>    | <p>Serpinine</p>  | <p>Stem,<br/>Leaves,<br/>Roots, Root<br/>bark</p> | <p>(1R,9R,10S,12R,13E,16S,17R,18R)-13-ethylidene-8-methyl-8,15-diazahexacyclo[14.2.1.0<sup>1,9</sup>.0<sup>2,7</sup>.0<sup>10,15</sup>.0<sup>12,17</sup>]nonadeca-2,4,6-trien-18-ol</p>                    |  |

|                    |            |                                         |                                                                                                                                                                                                                               |                                                                                                                                                                                                                                                                                                                                                                                                                                                                                  |
|--------------------|------------|-----------------------------------------|-------------------------------------------------------------------------------------------------------------------------------------------------------------------------------------------------------------------------------|----------------------------------------------------------------------------------------------------------------------------------------------------------------------------------------------------------------------------------------------------------------------------------------------------------------------------------------------------------------------------------------------------------------------------------------------------------------------------------|
| RASE0016<br>[6]    | Alstonine  | Roots                                   | (15S,16S,20S)-19-(methoxycarbonyl)-16-methyl-17-oxa-3,13 <sup>1</sup> {5}-diazapentacyclo[11.8.0.0 <sup>2</sup> {2,10}.0 <sup>4</sup> {4,9}.0 <sup>15</sup> {15,20}]henicosa-1(13),2(10),4(9),5,7,11,18-heptaen-13-ylum-3-ide | 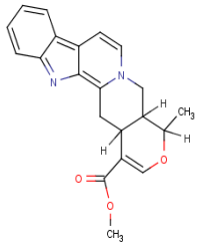 The chemical structure of Alstonine is a complex polycyclic alkaloid. It features a central diazapyrene-like core with a fused benzene ring and a nitrogen atom. The structure is highly substituted, including a methoxycarbonyl group (-COOCH3) and a methyl group (-CH3) on the heptaene chain. Stereochemistry is indicated with wedges and dashes.                                      |
| RASE0017<br>[8]    | Ajmalinine | Stem,<br>Leaves,<br>Roots, Root<br>bark | US                                                                                                                                                                                                                            |                                                                                                                                                                                                                                                                                                                                                                                                                                                                                  |
| RASE0018<br>[8,11] | Chandrine  | Stem,<br>Leaves,<br>Roots, Root<br>bark | US                                                                                                                                                                                                                            |                                                                                                                                                                                                                                                                                                                                                                                                                                                                                  |
| RASE0019<br>[11]   | Renoxidine | Roots                                   | Methyl 6,18-dimethoxy-13-oxo-17-(3,4,5-trimethoxybenzoyloxy)-3,13 <sup>1</sup> {5}-diazapentacyclo[11.8.0.0 <sup>2</sup> {2,10}.0 <sup>4</sup> {4,9}.0 <sup>15</sup> {15,20}]henicosa-2(10),4,6,8-tetraene-19-carboxylate     |  The chemical structure of Renoxidine is a complex polycyclic alkaloid. It features a central diazapyrene-like core with a fused benzene ring and a nitrogen atom. The structure is highly substituted, including a methyl 6,18-dimethoxy-13-oxo-17-(3,4,5-trimethoxybenzoyloxy) group and a methyl group (-CH3) on the tetraene chain. Stereochemistry is indicated with wedges and dashes. |

|                                |                    |                                                   |                                                                                                                                                                                               |                                                                                       |
|--------------------------------|--------------------|---------------------------------------------------|-----------------------------------------------------------------------------------------------------------------------------------------------------------------------------------------------|---------------------------------------------------------------------------------------|
| <p>RASE0020</p> <p>[11]</p>    | <p>Reserpiline</p> | <p>Stem,<br/>Leaves,<br/>Roots, Root<br/>bark</p> | <p>Methyl (1R,15S,16S,20S)-6,7-dimethoxy-16-methyl-17-oxa-3,13-diazapentacyclo[11.8.0.0<sup>2,10</sup>.0<sup>4,9</sup>.0<sup>15,20</sup>]]henicosa-2(10),4,6,8,18-pentaene-19-carboxylate</p> | 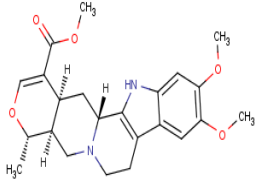   |
| <p>RASE0021</p> <p>[11,12]</p> | <p>Reserpinine</p> | <p>Stem,<br/>Leaves,<br/>Roots, Root<br/>bark</p> | <p>Methyl(1R,15S,17R,18R,19S,20S)-6,18-dimethoxy-17-[(E)-3-(3,4,5-trimethoxyphenyl)prop-2-enoyl]oxy-1,3,11,12,14,15,16,17,18,19,20,21-dodecahydrohimban-19-carboxylate</p>                    |    |
| <p>RASE0022</p> <p>[11]</p>    | <p>Ophioxilin</p>  | <p>Roots</p>                                      | <p>5-hydroxy-2-methyl-1,4-dihydronaphthalene-1,4-dione</p>                                                                                                                                    |    |
| <p>RASE0023</p> <p>[13]</p>    | <p>Rauwolscine</p> | <p>Roots</p>                                      | <p>Methyl (1S,15S,18S,19S,20S)-18-hydroxy-3,13-diazapentacyclo[11.8.0.0<sup>2,10</sup>.0<sup>4,9</sup>.0<sup>15,20</sup>]]henicosa-2(10),4,6,8-tetraene-19-carboxylate</p>                    |  |

|                                |                            |               |                                                                                                                                                                           |                                                                                                                                                                                                                                                                                                                                                                                                                                                                                               |
|--------------------------------|----------------------------|---------------|---------------------------------------------------------------------------------------------------------------------------------------------------------------------------|-----------------------------------------------------------------------------------------------------------------------------------------------------------------------------------------------------------------------------------------------------------------------------------------------------------------------------------------------------------------------------------------------------------------------------------------------------------------------------------------------|
| <p>RASE0024</p> <p>[8]</p>     | <p>Thebaine</p>            | <p>Roots</p>  | <p>(1S,5R,13R)-10,14-dimethoxy-4,5-dimethyl-12-oxa-4-azapentacyclo[9.6.1.0<sup>{1,13}</sup>.0<sup>{5,17}</sup>.0<sup>{7,18}</sup>]octadeca-7(18),8,10,14,16-pentaene</p>  | 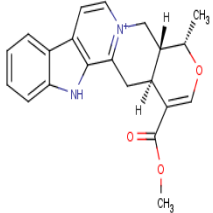 <p>The chemical structure of Thebaine is a complex pentacyclic alkaloid. It features a benzene ring fused to a five-membered ring containing a nitrogen atom. This is further fused to a six-membered ring with a carbonyl group at the 12-position. Two methyl groups are attached to the 4 and 5 positions, and a methoxy group is attached to the 10-position. The stereochemistry is (1S,5R,13R).</p> |
| <p>RASE0025</p> <p>[14]</p>    | <p>7-Dehydrositosterol</p> | <p>Roots</p>  | <p>(1S,2R,5S,11R,15R)-14-[(2R,5S)-5-ethyl-6-methylheptan-2-yl]-2,15-dimethyltetracyclo[8.7.0.0<sup>{2,7}</sup>.0<sup>{11,15}</sup>]heptadeca-7,9-dien-5-ol</p>            |  <p>The chemical structure of 7-Dehydrositosterol is a steroid derivative. It has a four-ring steroid nucleus with a hydroxyl group at the 3-position and a double bond between C7 and C8. At the 14-position, there is a side chain consisting of a 2-ethyl-6-methylheptan-2-yl group. The stereochemistry is (1S,2R,5S,11R,15R).</p>                                                                     |
| <p>RASE0026</p> <p>[15,16]</p> | <p>Stigmasterol</p>        | <p>Leaves</p> | <p>(3S,8S,9S,10R,13R,14S,17R)-17-[(E,2R,5S)-5-ethyl-6-methylhept-3-en-2-yl]-10,13-dimethyl-2,3,4,7,8,9,11,12,14,15,16,17-dodecahydro-1H-cyclopenta[a]phenanthren-3-ol</p> |  <p>The chemical structure of Stigmasterol is a steroid derivative. It has a four-ring steroid nucleus with a hydroxyl group at the 3-position and a double bond between C5 and C6. At the 17-position, there is a side chain consisting of an (E)-5-ethyl-6-methylhept-3-en-2-yl group. The stereochemistry is (3S,8S,9S,10R,13R,14S,17R).</p>                                                           |
| <p>RASE0027</p> <p>[11]</p>    | <p>Starch</p>              | <p>Roots</p>  | <p>US</p>                                                                                                                                                                 |                                                                                                                                                                                                                                                                                                                                                                                                                                                                                               |



|                                  |                                  |                                                            |                                                                                                                                                                                                                  |                                                                                      |
|----------------------------------|----------------------------------|------------------------------------------------------------|------------------------------------------------------------------------------------------------------------------------------------------------------------------------------------------------------------------|--------------------------------------------------------------------------------------|
| <p>RASE0028<br/>[15,17]</p>      | <p>2,6-Dimethoxybenzoquinone</p> | <p>Roots</p>                                               | <p>2,6-dimethoxycyclohexa-2,5-diene-1,4-dione</p>                                                                                                                                                                | 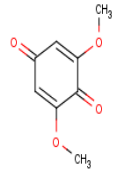  |
| <p>RASE0029<br/>[8,12]</p>       | <p>Tetraphyllicine</p>           | <p>Leaves, Root Bark</p>                                   | <p>(1R,9R,10S,12R,13E,16S,17R,18R)-13-ethylidene-8-methyl-8,15-diazahexacyclo[14.2.1.0<sup>1,9</sup>.0<sup>2,7</sup>.0<sup>10,15</sup>.0<sup>12,17</sup>]nonadeca-2,4,6-trien-18-ol</p>                          |   |
| <p>RASE0030<br/>[7,12,18,19]</p> | <p>Raucaffricine</p>             | <p>Roots, Hybrid Cell Culture, Cell Suspension Culture</p> | <p>13-ethylidene-14-[[3,4,5-trihydroxy-6-(hydroxymethyl)oxan-2-yl]oxy]-8,15-diazahexacyclo[14.2.1.0<sup>1,9</sup>.0<sup>2,7</sup>.0<sup>10,15</sup>.0<sup>12,17</sup>]nonadeca-2,4,6,8-tetraen-18-yl acetate</p> |  |

|                                  |                                                                            |                     |                                                                                                                                                                                                                 |                                                                                                                                                                                                                                                                                                                                                                                   |
|----------------------------------|----------------------------------------------------------------------------|---------------------|-----------------------------------------------------------------------------------------------------------------------------------------------------------------------------------------------------------------|-----------------------------------------------------------------------------------------------------------------------------------------------------------------------------------------------------------------------------------------------------------------------------------------------------------------------------------------------------------------------------------|
| <p>RASE0031<br/>[1,4,5,7,18]</p> | <p>Vomilenine</p>                                                          | <p>Root culture</p> | <p>(1R,10S,12R,13E,14R,16S)-13-ethylidene-14-hydroxy-8,15-diazahexacyclo[14.2.1.0<sup>1,9</sup>.0<sup>2,7</sup>.0<sup>10,15</sup>.0<sup>12,17</sup>]nonadeca-2,4,6,8-tetraen-18-yl acetate</p>                  | 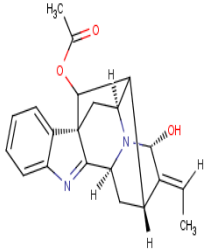 <p>The structure shows a complex polycyclic system with a benzene ring fused to a diazacyclic system. It features a methyl group (CH<sub>3</sub>) and a hydroxyl group (OH) on the polycyclic core, and an acetate group (H<sub>3</sub>C-C(=O)-O-) attached to one of the nitrogen atoms.</p> |
| <p>RASE0032<br/>[20]</p>         | <p>10-Hydroxy-N(<math>\alpha</math>)-demethyl-19,20-dehydroraumac line</p> | <p>Root culture</p> | <p>US</p>                                                                                                                                                                                                       |  <p>The structure shows a complex polycyclic system with a benzene ring fused to a diazacyclic system. It features a methyl group (CH<sub>3</sub>) and a hydroxyl group (OH) on the polycyclic core, and a methyl group (CH<sub>3</sub>) attached to one of the nitrogen atoms.</p>           |
| <p>RASE0033<br/>[21,22]</p>      | <p>Raumacline</p>                                                          | <p>Root culture</p> | <p>(1S,12S,13S,18S)-1,11,12,13,18-pentahydrogenio-17-(1-hydrogenioethyl)-3-methyl-15-oxa-3,20-diazapentacyclo[10.7.1.0<sup>2,10</sup>.0<sup>4,9</sup>.0<sup>13,18</sup>]jicosa-2(10),4(9),5,7-tetraen-14-ol</p> |  <p>The structure shows a complex polycyclic system with a benzene ring fused to a diazacyclic system. It features a methyl group (CH<sub>3</sub>) and a hydroxyl group (OH) on the polycyclic core, and a methyl group (CH<sub>3</sub>) attached to one of the nitrogen atoms.</p>           |

|                                      |                        |                            |                                                                                                                                                                                                            |                                                                                                                                                                                                                                                                                                                                                                                 |
|--------------------------------------|------------------------|----------------------------|------------------------------------------------------------------------------------------------------------------------------------------------------------------------------------------------------------|---------------------------------------------------------------------------------------------------------------------------------------------------------------------------------------------------------------------------------------------------------------------------------------------------------------------------------------------------------------------------------|
| <p>RASE0034</p> <p>[4,5,23]</p>      | <p>Raucaffrinoline</p> | <p>Cell culture</p>        | <p>(1R,10S,12S,13R,14S,16S)-13-(hydroxymethyl)-14-methyl-8,15-diazahexacyclo[14.2.1.0<sup>{1,9}</sup>.0<sup>{2,7}</sup>.0<sup>{10,15}</sup>.0<sup>{12,17}</sup>]nonadeca-2,4,6,8-tetraen-18-yl acetate</p> | 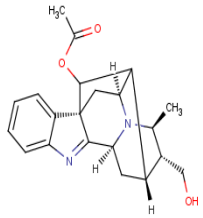 <p>The structure shows a complex polycyclic system with a benzene ring fused to a diazacyclic core. It features a methyl group (CH<sub>3</sub>) and a hydroxymethyl group (CH<sub>2</sub>OH) on the ring system, and an acetate group (CH<sub>3</sub>COO-) attached to the 13-position.</p> |
| <p>RASE0035</p> <p>[4,5,7,12,23]</p> | <p>Perakine</p>        | <p>Hybrid Cell Culture</p> | <p>(1R,10S,13R,14S,16S,18R)-13-formyl-14-methyl-8,15-diazahexacyclo[14.2.1.0<sup>{1,9}</sup>.0<sup>{2,7}</sup>.0<sup>{10,15}</sup>.0<sup>{12,17}</sup>]nonadeca-2,4,6,8-tetraen-18-yl acetate</p>          |  <p>The structure is similar to Raucaffrinoline but has a formyl group (CHO) instead of a hydroxymethyl group at the 13-position. It also has a methyl group (CH<sub>3</sub>) and an acetate group (CH<sub>3</sub>COO-) attached to the ring system.</p>                                     |
| <p>RASE0036</p> <p>[4,5,18]</p>      | <p>Vinorine</p>        | <p>Cell culture</p>        | <p>(1R,10S,16S)-13-ethylidene-8,15-diazahexacyclo[14.2.1.0<sup>{1,9}</sup>.0<sup>{2,7}</sup>.0<sup>{10,15}</sup>.0<sup>{12,17}</sup>]nonadeca-2,4,6,8-tetraen-18-yl acetate</p>                            |  <p>The structure features a complex polycyclic system with a benzene ring fused to a diazacyclic core. It has an ethylidene group (=CHCH<sub>2</sub>) and an acetate group (CH<sub>3</sub>COO-) attached to the ring system.</p>                                                           |

|                            |                             |                     |                                                                                                                                                                                                           |                                                                                                                                                                                                                                                                                                                         |
|----------------------------|-----------------------------|---------------------|-----------------------------------------------------------------------------------------------------------------------------------------------------------------------------------------------------------|-------------------------------------------------------------------------------------------------------------------------------------------------------------------------------------------------------------------------------------------------------------------------------------------------------------------------|
| <p>RASE0037<br/>[5,24]</p> | <p>16-epi-vellosimine</p>   | <p>Cell culture</p> | <p>(1S,12S,14S)-15-ethylidene-3,17-diazapentacyclo[12.3.1.0<sup>{2,10}</sup>.0<sup>{4,9}</sup>.0<sup>{12,17}</sup>]octadeca-2(10),4(9),5,7-tetraene-13-carbaldehyde</p>                                   | 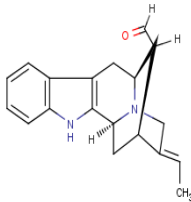 <p>The structure shows a complex polycyclic system with a benzene ring fused to a five-membered ring containing two nitrogen atoms. A side chain includes a double bond with an ethylidene group and a terminal aldehyde group.</p> |
| <p>RASE0038<br/>[25]</p>   | <p>11-Methoxyvinorine</p>   | <p>Cell culture</p> | <p>(1R,10S,12R,13E,16S,18R)-13-ethylidene-5-methoxy-8,15-diazahexacyclo[14.2.1.0<sup>{1,9}</sup>.0<sup>{2,7}</sup>.0<sup>{10,15}</sup>.0<sup>{12,17}</sup>]nonadeca-2(7),3,5,8-tetraen-18-yl acetate</p>  |  <p>The structure features a complex polycyclic core with a benzene ring. It has a side chain with a double bond, an ethylidene group, and an acetate group. A methoxy group is attached to the benzene ring.</p>                    |
| <p>RASE0039<br/>[4]</p>    | <p>Vellosimine</p>          | <p>Cell culture</p> | <p>(12S,14S,15E)-15-ethylidene-3,17-diazapentacyclo[12.3.1.0<sup>{2,10}</sup>.0<sup>{4,9}</sup>.0<sup>{12,17}</sup>]octadeca-2(10),4,6,8-tetraene-13-carbaldehyde</p>                                     |  <p>The structure is similar to 16-epi-vellosimine but with a different stereochemistry at the bridgehead positions, resulting in a different side chain configuration.</p>                                                         |
| <p>RASE0040<br/>[5]</p>    | <p>1,2-dihydrovomilnine</p> | <p>Cell culture</p> | <p>(1R,9R,10S,12R,13E,14R,16S,18R)-13-ethylidene-14-hydroxy-8,15-diazahexacyclo[14.2.1.0<sup>{1,9}</sup>.0<sup>{2,7}</sup>.0<sup>{10,15}</sup>.0<sup>{12,17}</sup>]nonadeca-2,4,6-trien-18-yl acetate</p> |  <p>The structure is a complex polycyclic system with a benzene ring. It features a side chain with a double bond, an ethylidene group, and an acetate group. A hydroxyl group is attached to the polycyclic core.</p>             |

|                              |                                |                                       |                                                                                                                                                                                                   |                                                                                                                                                                                                                                                                                                                                                                                                                                                                                                                    |
|------------------------------|--------------------------------|---------------------------------------|---------------------------------------------------------------------------------------------------------------------------------------------------------------------------------------------------|--------------------------------------------------------------------------------------------------------------------------------------------------------------------------------------------------------------------------------------------------------------------------------------------------------------------------------------------------------------------------------------------------------------------------------------------------------------------------------------------------------------------|
| <p>RASE0041<br/>[5,7]</p>    | <p>17-O-Acetyl-norajmaline</p> | <p>Cell culture</p>                   | <p>(1R,9R,10S,12R,13S,14R,16S)-13-ethyl-14-hydroxy-8-methyl-8,15-diazahexacyclo[14.2.1.0<sup>1,9</sup>.0<sup>2,7</sup>.0<sup>10,15</sup>.0<sup>12,17</sup>]nonadeca-2,4,6-trien-18-yl acetate</p> | 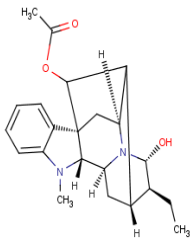 <p>The structure shows a complex polycyclic alkaloid core with a benzene ring fused to a six-membered ring containing a nitrogen atom. A methyl group is attached to the nitrogen. The core is further fused to a bicyclic system. A hydroxyl group is attached to the bicyclic system, and an acetyl group is attached to the oxygen atom of the bicyclic system. A methyl group is also attached to the bicyclic system.</p> |
| <p>RASE0042<br/>[4,5,12]</p> | <p>Norajmaline</p>             | <p>Hybrid Cell Culture</p>            | <p>(1R,9R,10S,12R,13S,14R,16S)-13-ethyl-8-methyl-8,15-diazahexacyclo[14.2.1.0<sup>1,9</sup>.0<sup>2,7</sup>.0<sup>10,15</sup>.0<sup>12,17</sup>]nonadeca-2,4,6-triene-14,18-diol</p>              |  <p>The structure shows a complex polycyclic alkaloid core with a benzene ring fused to a six-membered ring containing a nitrogen atom. A methyl group is attached to the nitrogen. The core is further fused to a bicyclic system. Two hydroxyl groups are attached to the bicyclic system, and a methyl group is also attached to the bicyclic system.</p>                                                                    |
| <p>RASE0043<br/>[26]</p>     | <p>Rauwolfine</p>              | <p>Stem, Leaves, Roots, Root bark</p> | <p>(9R,14R)-13-ethyl-8-methyl-8,15-diazahexacyclo[14.2.1.0<sup>1,9</sup>.0<sup>2,7</sup>.0<sup>10,15</sup>.0<sup>12,17</sup>]nonadeca-2,4,6-triene-14,18-diol</p>                                 |  <p>The structure shows a complex polycyclic alkaloid core with a benzene ring fused to a six-membered ring containing a nitrogen atom. A methyl group is attached to the nitrogen. The core is further fused to a bicyclic system. Two hydroxyl groups are attached to the bicyclic system, and a methyl group is also attached to the bicyclic system.</p>                                                                   |
| <p>RASE0044<br/>[6,8]</p>    | <p>Rauwolfinine</p>            | <p>Root Bark</p>                      | <p>13-ethyl-8-methyl-19-oxa-8,15-diazahexacyclo[14.3.1.0<sup>1,9</sup>.0<sup>2,7</sup>.0<sup>10,15</sup>.0<sup>12,17</sup>]icosa-2(7),3,5-trien-18-ol</p>                                         |  <p>The structure shows a complex polycyclic alkaloid core with a benzene ring fused to a six-membered ring containing a nitrogen atom. A methyl group is attached to the nitrogen. The core is further fused to a bicyclic system. A hydroxyl group is attached to the bicyclic system, and a methyl group is also attached to the bicyclic system.</p>                                                                      |

|                          |                      |                                                   |                                                                                                                                                                                                                                    |                                                                                      |
|--------------------------|----------------------|---------------------------------------------------|------------------------------------------------------------------------------------------------------------------------------------------------------------------------------------------------------------------------------------|--------------------------------------------------------------------------------------|
| <p>RASE0045<br/>[27]</p> | <p>Rescinnamide</p>  | <p>Roots</p>                                      | <p>Methyl (1R,15S,17R,18R,19S,20S)-6,18-dimethoxy-17-([3-(3,4,5-trimethoxyphenyl)propanoyl]oxy)-3,13-diazapentacyclo[11.8.0.0<sup>2,10</sup>.0<sup>4,9</sup>.0<sup>15,20</sup>]henicosa-2(10),4(9),5,7-tetraene-19-carboxylate</p> | 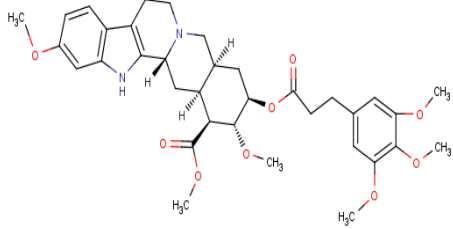  |
| <p>RASE0046<br/>[27]</p> | <p>Rescinnaminol</p> | <p>Roots</p>                                      | <p>1-((7-methoxy-1,10-diazapentacyclo[11.8.0.0<sup>3,11</sup>.0<sup>4,9</sup>.0<sup>15,20</sup>]henicosa-3(11),4(9),5,7-tetraen-18-yl)oxy)-3-(3,4,5-trimethoxyphenyl)propan-1-ol</p>                                               |   |
| <p>RASE0047<br/>[6]</p>  | <p>Tetraphylline</p> | <p>Stem,<br/>Leaves,<br/>Roots, Root<br/>bark</p> | <p>Methyl (1S,15R,16S,20S)-6-methoxy-16-methyl-17-oxa-3,13-diazapentacyclo[11.8.0.0<sup>2,10</sup>.0<sup>4,9</sup>.0<sup>15,20</sup>]henicosa-2(10),4(9),5,7,18-pentaene-19-carboxylate</p>                                        |  |

|                               |                      |                                                   |                                                                                                                                                                           |                                                                                                                                                                                                                                                                                                                        |
|-------------------------------|----------------------|---------------------------------------------------|---------------------------------------------------------------------------------------------------------------------------------------------------------------------------|------------------------------------------------------------------------------------------------------------------------------------------------------------------------------------------------------------------------------------------------------------------------------------------------------------------------|
| <p>RASE0048</p> <p>[27]</p>   | <p>Indobine</p>      | <p>Roots</p>                                      | <p>Benzyl 3-(1H-indol-3-yl)propanoate</p>                                                                                                                                 | 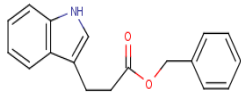 <p>The structure shows a benzene ring attached to a propanoate chain, which is further attached to the 3-position of an indole ring. The indole ring is highlighted in blue.</p>                                                   |
| <p>RASE0049</p> <p>[8]</p>    | <p>Indobinine</p>    | <p>Roots</p>                                      | <p>Cyclohexyl 3-(1H-indol-3-yl)propanoate</p>                                                                                                                             |  <p>The structure shows a cyclohexane ring attached to a propanoate chain, which is further attached to the 3-position of an indole ring. The indole ring is highlighted in blue.</p>                                               |
| <p>RASE0050</p> <p>[8,12]</p> | <p>Isorauhimbine</p> | <p>Stem,<br/>Leaves,<br/>Roots, Root<br/>bark</p> | <p>Methyl (1R,15S,18S,19S,20S)-18-hydroxy-3,13-diazapentacyclo[11.8.0.0<sup>2,10</sup>.0<sup>4,9</sup>.0<sup>15,20</sup>]henicosa-2(10),4,6,8-tetraene-19-carboxylate</p> |  <p>The structure is a complex polycyclic system with two nitrogen atoms in a bridgehead position. It features a methyl group, a hydroxyl group, and a carboxylate group. Stereochemistry is indicated with wedges and dashes.</p> |

|                                |                       |                                                   |                                                                                                                                                                            |                                                                                      |
|--------------------------------|-----------------------|---------------------------------------------------|----------------------------------------------------------------------------------------------------------------------------------------------------------------------------|--------------------------------------------------------------------------------------|
| <p>RASE0051</p> <p>[16,17]</p> | <p>Rauhimbine</p>     | <p>Stem,<br/>Leaves,<br/>Roots, Root<br/>bark</p> | <p>Methyl (1S,15R,18S,19S,20S)-18-hydroxy-3,13-diazapentacyclo[11.8.0.0<sup>2,10</sup>.0<sup>4,9</sup>.0<sup>15,20</sup>]]henicosa-2(10),4,6,8-tetraene-19-carboxylate</p> | 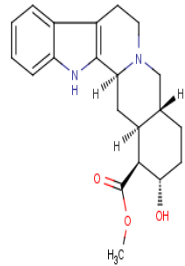  |
| <p>RASE0052</p> <p>[8]</p>     | <p>Sandwicolidine</p> | <p>Undried roots</p>                              | <p>14-ethyl-13-methoxy-8-methyl-8,15-diazahexacyclo[14.2.1.0<sup>1,9</sup>.0<sup>2,7</sup>.0<sup>10,15</sup>.0<sup>12,17</sup>]]nonadeca-2(7),3,5-trien-18-ol</p>          |   |
| <p>RASE0053</p> <p>[8]</p>     | <p>Sandwicoline</p>   | <p>Undried roots</p>                              | <p>14-(1-hydroxybutan-2-yl)-3,16-dimethyl-3,16-diazapentacyclo[10.3.1.1<sup>10,13</sup>.0<sup>2,10</sup>.0<sup>4,9</sup>]]heptadeca-4(9),5,7-trien-17-ol</p>               |  |



|                             |                    |              |                                                                                                                                  |                                                                                      |
|-----------------------------|--------------------|--------------|----------------------------------------------------------------------------------------------------------------------------------|--------------------------------------------------------------------------------------|
| <p>RASE0054</p> <p>[8]</p>  | <p>Yohambinine</p> | <p>Roots</p> | <p>12-methyl-3,13-diazapentacyclo[11.8.0.0<sup>2,10</sup>.0<sup>4,9</sup>.0<sup>15,20</sup>]henicosa-2(10),4(9),5,7-tetraene</p> | 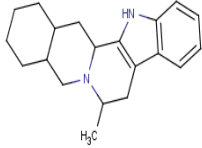  |
| <p>RASE0055</p> <p>[28]</p> | <p>Sucrose</p>     | <p>US</p>    | <p>(2R,3R,4S,5S,6R)-2-[(2S,3S,4S,5R)-3,4-dihydroxy-2,5-bis(hydroxymethyl)oxolan-2-yl]oxy-6-(hydroxymethyl)oxane-3,4,5-triol</p>  |   |
| <p>RASE0056</p> <p>[29]</p> | <p>Oleic acid</p>  | <p>US</p>    | <p>(9Z)-octadec-9-enoic acid</p>                                                                                                 |  |

|                             |                                       |           |                                                                                                                                                                                                                                                                                  |                                                                                      |
|-----------------------------|---------------------------------------|-----------|----------------------------------------------------------------------------------------------------------------------------------------------------------------------------------------------------------------------------------------------------------------------------------|--------------------------------------------------------------------------------------|
| <p>RASE0057</p> <p>[29]</p> | <p>Fumaric acid</p>                   | <p>US</p> | <p>(2E)-but-2-enedioic acid</p>                                                                                                                                                                                                                                                  | 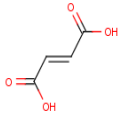  |
| <p>RASE0058</p> <p>[29]</p> | <p><math>\gamma</math>-Sitosterol</p> | <p>US</p> | <p>(3S)-17-[(5S)-5-ethyl-6-methylheptan-2-yl]-10,13-dimethyl-2,3,4,7,8,9,11,12,14,15,16,17-dodecahydro-1H-cyclopenta[a]phenanthren-3-ol (3S)-17-[(5S)-5-ethyl-6-methylheptan-2-yl]-10,13-dimethyl-2,3,4,7,8,9,11,12,14,15,16,17-dodecahydro-1H-cyclopenta[a]phenanthren-3-ol</p> |   |
| <p>RASE0059</p> <p>[29]</p> | <p><math>\beta</math>-Sitosterol</p>  | <p>US</p> | <p>(3S,8S,9S,10R,13R,14S,17R)-17-[(2S,5S)-5-ethyl-6-methylheptan-2-yl]-10,13-dimethyl-2,3,4,7,8,9,11,12,14,15,16,17-dodecahydro-1H-cyclopenta[a]phenanthren-3-ol</p>                                                                                                             |  |

|                             |                                |                           |                                                                                                                                                                                        |                                                                                       |
|-----------------------------|--------------------------------|---------------------------|----------------------------------------------------------------------------------------------------------------------------------------------------------------------------------------|---------------------------------------------------------------------------------------|
| <p>RASE0060</p> <p>[30]</p> | <p>Serposterol</p>             | <p>US</p>                 | <p>14-[(3E)-5-ethyl-6-methylhept-3-en-2-yl]-2,15-dimethyltetracyclo[8.7.0.0<sup>2,7</sup>.0<sup>11,15</sup>]heptadec-7-en-5-ol</p>                                                     | 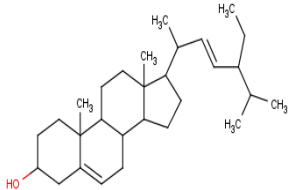   |
| <p>RASE0061</p> <p>[28]</p> | <p>Diisobutyl phthalate</p>    | <p>Roots</p>              | <p>1,2-bis(2-methylpropyl) benzene-1,2-dicarboxylate</p>                                                                                                                               |    |
| <p>RASE0062</p> <p>[3]</p>  | <p>Deserpodic acid lactone</p> | <p>Dried roots</p>        | <p>(1S,2S,4R,18S,20R,23R)-23-methoxy-21-oxa-6,16-diazahexacyclo[18.2.1.0<sup>2,18</sup>.0<sup>4,16</sup>.0<sup>5,13</sup>.0<sup>7,12</sup>]tricoso-5(13),7(12),8,10-tetraen-22-one</p> |   |
| <p>RASE0063</p> <p>[4]</p>  | <p>Vallesiachotamine</p>       | <p>Hairy Root Culture</p> | <p>Methyl(2S,12bS)-2-[(E)-1-oxobut-2-en-2-yl]-1,2,6,7,12,12b-hexahydroindolo[2,3-a]quinolizine-3-carboxylate</p>                                                                       |  |

|                  |                                        |                         |                                                                                                                                                                                               |                                                                                       |
|------------------|----------------------------------------|-------------------------|-----------------------------------------------------------------------------------------------------------------------------------------------------------------------------------------------|---------------------------------------------------------------------------------------|
| RASE0064<br>[22] | 19-Hydroxy-N $\beta$ -methytraumacline | Cell Suspension Culture | (1S,12S,13S,14R,17S,18S)-17-(1-hydroxyethyl)-3,20-dimethyl-15-oxa-3,20-diazapentacyclo[10.7.1.0 <sup>2,10</sup> .0 <sup>4,9</sup> .0 <sup>13,18</sup> ]]icosa-2(10),4(9),5,7-tetraen-14-ol    | 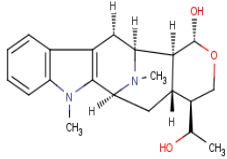   |
| RASE0065<br>[22] | 6 $\alpha$ -Hydroxytraumacline         | Cell Suspension Culture | (1S,11S,12R,13S,14R,17S,18S)-17-ethyl-3-methyl-15-oxa-3,20-diazapentacyclo[10.7.1.0 <sup>2,10</sup> .0 <sup>4,9</sup> .0 <sup>13,18</sup> ]]icosa-2(10),4(9),5,7-tetraene-11,14-diol          |    |
| RASE0066<br>[22] | 6 $\alpha$ -Methoxytraumacline         | Cell Suspension Culture | (1S,11S,12R,13S,14R,17S,18S)-17-ethyl-11-methoxy-3-methyl-15-oxa-3,20-diazapentacyclo[10.7.1.0 <sup>2,10</sup> .0 <sup>4,9</sup> .0 <sup>13,18</sup> ]]icosa-2(10),4(9),5,7-tetraen-14-ol     |   |
| RASE0067<br>[12] | N(b)-Methylajmaline                    | Dried roots             | (1R,9R,12S,16S)-13-ethyl-14,18-dihydroxy-8,15-dimethyl-8,15-diazahexacyclo[14.2.1.0 <sup>1,9</sup> .0 <sup>2,7</sup> .0 <sup>10,15</sup> .0 <sup>12,17</sup> ]]nonadeca-2(7),3,5-trien-15-ium |  |

|                  |                                |             |                                                                                                                                                                                                      |                                                                                       |
|------------------|--------------------------------|-------------|------------------------------------------------------------------------------------------------------------------------------------------------------------------------------------------------------|---------------------------------------------------------------------------------------|
| RASE0068<br>[12] | N(b)-<br>Methylisoajmal<br>ine | Dried roots | (1R,9R,12S,13R,14S,16S)-13-ethyl-14,18-dihydroxy-8,15-dimethyl-8,15-diazahexacyclo[14.2.1.0 <sup>1,9</sup> .0 <sup>2,7</sup> .0 <sup>10,15</sup> .0 <sup>12,17</sup> ]nonadeca-2(7),3,5-trien-15-ium | 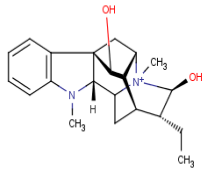   |
| RASE0069<br>[12] | 3-<br>Hydroxysarpag<br>ine     | Dried roots | (1R,12S,14S)-15-ethylidene-13-(hydroxymethyl)-3,17-diazapentacyclo[12.3.1.0 <sup>2,10</sup> .0 <sup>4,9</sup> .0 <sup>12,17</sup> ]octadeca-2(10),4(9),5,7-tetraene-1,7-diol                         |    |
| RASE0070<br>[12] | Yohimbinic<br>acid             | Dried roots | (1S,15R,18S,19R,20S)-18-hydroxy-3,13-diazapentacyclo[11.8.0.0 <sup>2,10</sup> .0 <sup>4,9</sup> .0 <sup>15,20</sup> ]heneicosa-2(10),4,6,8-tetraene-19-carboperoxoic acid                            |   |
| RASE0071<br>[12] | Isorauhimbic<br>acid           | Dried roots | (1S,15R,18S,19R,20S)-18-hydroxy-3,13-diazapentacyclo[11.8.0.0 <sup>2,10</sup> .0 <sup>4,9</sup> .0 <sup>15,20</sup> ]heneicosa-2(10),4,6,8-tetraene-19-carboperoxoic acid                            |  |

|                              |                                                    |                    |                                                                                                                                                                             |                                                                                      |
|------------------------------|----------------------------------------------------|--------------------|-----------------------------------------------------------------------------------------------------------------------------------------------------------------------------|--------------------------------------------------------------------------------------|
| <p>RASE0072</p> <p>[12]</p>  | <p>7-Epiloganin</p>                                | <p>Dried roots</p> | <p>Methyl (1R,2R,3aS,7aS)-2-hydroxy-1-methyl-7-{{3,4,5-trihydroxy-6-(hydroxymethyl)oxan-2-yl}oxy}-2,3,3a,6,7,7a-hexahydro-1H-indene-4-carboxylate</p>                       | 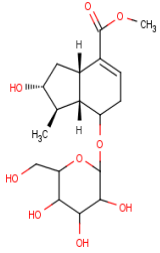  |
| <p>RASE0073</p> <p>[12]</p>  | <p>6'-O-(3,4,5-trimethoxybenzoyl)glomeratose A</p> | <p>Dried roots</p> | <p>(3,4,5-trihydroxy-6-{{4-hydroxy-2,5-bis(hydroxymethyl)-3-{{(2E)-3-(3,4,5-trimethoxyphenyl)prop-2-enoyl}oxy}oxolan-2-yl}oxy}oxan-2-yl)methyl 3,4,5-trimethoxybenzoate</p> |   |
| <p>RASE00074</p> <p>[12]</p> | <p>Normacusine B</p>                               | <p>Dried roots</p> | <p>[(15Z)-15-ethylidene-3,17-diazapentacyclo[12.3.1.0<sup>2,10</sup>.0<sup>4,9</sup>.0<sup>12,17</sup>]}octadeca-2(10),4,6,8-tetraen-13-yl]methanol</p>                     |  |

|                              |                                   |                    |                                                                                                                                                                        |                                                                                       |
|------------------------------|-----------------------------------|--------------------|------------------------------------------------------------------------------------------------------------------------------------------------------------------------|---------------------------------------------------------------------------------------|
| <p>RASE0075<br/>[12]</p>     | <p>Geissoschizol</p>              | <p>Dried roots</p> | <p>2-[(2S,4R,5E)-5-ethylidene-7,17-diazatetracyclo[8.7.0.0<sup>2,7</sup>.0<sup>11,16</sup>]]heptadeca-1(10),11(16),12,14-tetraen-4-yl]ethan-1-ol</p>                   | 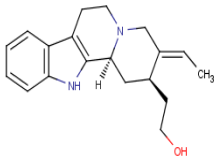   |
| <p>RASE0076<br/>[12]</p>     | <p>Rhazimanine</p>                | <p>Dried roots</p> | <p>Methyl (11S,12E,18S)-12-ethylidene-17-oxo-14-azapentacyclo[9.5.3.0<sup>1,10</sup>.0<sup>2,7</sup>.0<sup>14,18</sup>]]nonadeca-2,4,6,8-tetraene-10-carboxylate</p>   |    |
| <p>RASE0077<br/>[12]</p>     | <p>18-Hydroxyepialloyohimbine</p> | <p>Dried roots</p> | <p>Methyl 17,18-dihydroxy-3,13-diazapentacyclo[11.8.0.0<sup>2,10</sup>.0<sup>4,9</sup>.0<sup>15,20</sup>]]hencosa-2(10),4,6,8-tetraene-19-carboxylate</p>              |   |
| <p>RASE0078<br/>[3,8,12]</p> | <p>Methyl reserpate</p>           | <p>Dried roots</p> | <p>Methyl 17-hydroxy-6,18-dimethoxy-3,13-diazapentacyclo[11.8.0.0<sup>2,10</sup>.0<sup>4,9</sup>.0<sup>15,20</sup>]]hencosa-2(10),4(9),5,7-tetraene-19-carboxylate</p> |  |

|                          |                                                                            |                    |                                                                                                                                                                                                 |                                                                                      |
|--------------------------|----------------------------------------------------------------------------|--------------------|-------------------------------------------------------------------------------------------------------------------------------------------------------------------------------------------------|--------------------------------------------------------------------------------------|
| <p>RASE0079<br/>[12]</p> | <p>Loganic acid</p>                                                        | <p>Dried roots</p> | <p>(1S,4aS,6S,7R,7aS)-6-hydroxy-7-methyl-1-<br/>{[(2S,3R,4S,5S,6R)-3,4,5-trihydroxy-6-<br/>(hydroxymethyl)oxan-2-yl]oxy}-<br/>1H,4aH,5H,6H,7H,7aH-cyclopenta[c]pyran-<br/>4-carboxylic acid</p> | 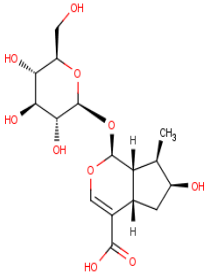  |
| <p>RASE0080<br/>[12]</p> | <p>7-<br/>Deoxyloganic<br/>acid</p>                                        | <p>Dried roots</p> | <p>7-methyl-1-[[3,4,5-trihydroxy-6-<br/>(hydroxymethyl)oxan-2-yl]oxy]-<br/>1H,4aH,5H,6H,7H,7aH-cyclopenta[c]pyran-<br/>4-carboxylic acid</p>                                                    |   |
| <p>RASE0081<br/>[12]</p> | <p>Secoxyloganin</p>                                                       | <p>Dried roots</p> | <p>2-[(2S,3R,4S)-3-ethenyl-5-<br/>(methoxycarbonyl)-2-[[2-(2S,3R,4S,5S,6R)-<br/>3,4,5-trihydroxy-6-(hydroxymethyl)oxan-2-<br/>yl]oxy]-3,4-dihydro-2H-pyran-4-yl]acetic<br/>acid</p>             |  |
| <p>RASE0082<br/>[12]</p> | <p>(+)-<br/>Isolariciresinol<br/>3a-O-beta-D-<br/>glucopyranosid<br/>e</p> | <p>Dried roots</p> | <p>US</p>                                                                                                                                                                                       |                                                                                      |



|                          |                                              |                    |                                                                                                                                                                                                                                         |                                                                                       |
|--------------------------|----------------------------------------------|--------------------|-----------------------------------------------------------------------------------------------------------------------------------------------------------------------------------------------------------------------------------------|---------------------------------------------------------------------------------------|
| <p>RASE0083<br/>[12]</p> | <p>Glomeratose A</p>                         | <p>Dried roots</p> | <p>4-hydroxy-2,5-bis(hydroxymethyl)-2-<br/>{[3,4,5-trihydroxy-6-(hydroxymethyl)oxan-<br/>2-yl]oxy}oxolan-3-yl (2E)-3-(3,4,5-<br/>trimethoxyphenyl)prop-2-enoate</p>                                                                     | 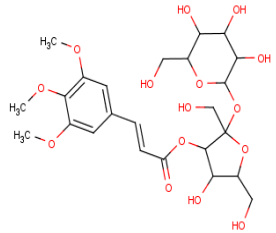   |
| <p>RASE0084<br/>[12]</p> | <p>16-<br/>Epinormacusin<br/>e B</p>         | <p>Dried roots</p> | <p>[(15E)-15-ethylidene-3,17-<br/>diazapentacyclo[12.3.1.0<sup>2,10</sup>.0<sup>4,9</sup>.0<sup>12,17</sup>]<br/>octadeca-2(10),4(9),5,7-tetraen-13-<br/>yl]methanol</p>                                                                |    |
| <p>RASE0085<br/>[12]</p> | <p>Swertiaside</p>                           | <p>Dried roots</p> | <p>6-(3-hydroxybenzoyloxy)-7-methyl-1-<br/>{[3,4,5-trihydroxy-6-(hydroxymethyl)oxan-<br/>2-yl]oxy}-1H,4aH,5H,6H,7H,7aH-<br/>cyclopenta[c]pyran-4-carboxylic acid</p>                                                                    |   |
| <p>RASE0086<br/>[9]</p>  | <p>3,4,5,6-<br/>Tetrahydroy<br/>ohimbine</p> | <p>Roots</p>       | <p>(15R,18S,19R,20S)-18-hydroxy-19-<br/>(methoxycarbonyl)-3,13<sup>1</sup><sub>5</sub>-<br/>diazapentacyclo[11.8.0.0<sup>2,10</sup>.0<sup>4,9</sup>.0<sup>15,20</sup>]<br/>heneicosa-1(13),2(10),4,6,8,11-<br/>hexaen-13-ylum-3-ide</p> |  |

|                 |                                                           |                     |                                                                                                                                                                                           |                                                                                       |
|-----------------|-----------------------------------------------------------|---------------------|-------------------------------------------------------------------------------------------------------------------------------------------------------------------------------------------|---------------------------------------------------------------------------------------|
| RASE0087<br>[9] | 3,4,5,6-Tetrahydro-(Z)-geissoschizol                      | Roots               | (2R,3Z)-3-ethylidene-2-(2-hydroxyethyl)-1H,2H,3H,4H,12H-5 <sup>+</sup> ,12-indolo[2,3-a]quinolizin-5-ylum-12-ide                                                                          | 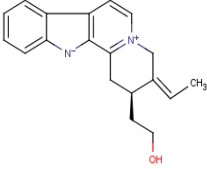   |
| RASE0088<br>[9] | 3,4,5,6-Tetrahydrogeissoschizol                           | Roots               | (2R,3E)-3-ethylidene-2-(2-hydroxyethyl)-1H,2H,3H,4H,12H-5 <sup>+</sup> ,12-indolo[2,3-a]quinolizin-5-ylum-12-ide                                                                          |    |
| RASE0089<br>[9] | 3,4,5,6-Tetrahydrogeissoschizine-17-O-b-d-glucopyranoside | Roots               | (2S,3E)-3-ethylidene-2-[(1Z)-3-methoxy-3-oxo-1-[[3,4,5-trihydroxy-6-(hydroxymethyl)oxan-2-yl]oxy]prop-1-en-2-yl]-1H,2H,3H,4H,12H-5 <sup>+</sup> ,12-indolo[2,3-a]quinolizin-5-ylum-12-ide |    |
| RASE0090<br>[7] | 3-Oxo-rhazinilam                                          | Hybrid Cell Culture | 12-ethyl-8,16-diazatetracyclo[10.6.1.0 <sup>2,7</sup> .0 <sup>16,19</sup> ]nonadeca-1(19),2(7),3,5,17-pentaene-9,15-dione                                                                 |  |

|                     |            |                               |                                                                                                                                                                                         |                                                                                      |
|---------------------|------------|-------------------------------|-----------------------------------------------------------------------------------------------------------------------------------------------------------------------------------------|--------------------------------------------------------------------------------------|
| RASE0091<br>[31,32] | Arbutin    | Cell<br>Suspension<br>Culture | (2R,3S,4S,5R,6S)-2-(hydroxymethyl)-6-(4-hydroxyphenoxy)oxane-3,4,5-triol                                                                                                                | 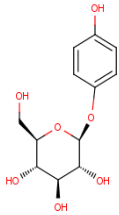  |
| RASE0092<br>[33]    | Ajmalimine | Roots                         | 13-ethyl-14-hydroxy-8-methyl-8,15-diazahexacyclo[14.2.1.0 <sup>1,9</sup> .0 <sup>2,7</sup> .0 <sup>10,15</sup> .0 <sup>12,17</sup> ]nonadeca-2,4,6-trien-18-yl 3,4,5-trimethoxybenzoate |   |
| RASE0093<br>[5,24]  | Tryptamine | Cell culture                  | 2-(1H-indol-3-yl)ethanamine                                                                                                                                                             |  |

|                               |                            |                                |                                                                                                                                                                                  |                                                                                      |
|-------------------------------|----------------------------|--------------------------------|----------------------------------------------------------------------------------------------------------------------------------------------------------------------------------|--------------------------------------------------------------------------------------|
| <p>RASE0094</p> <p>[5,24]</p> | <p>Secologanin</p>         | <p>Cell culture</p>            | <p>Methyl (2S,3R,4S)-3-ethenyl-4-(2-oxoethyl)-2-[[[(2S,3R,4S,5S,6R)-3,4,5-trihydroxy-6-(hydroxymethyl)oxan-2-yl]oxy]-3,4-dihydro-2H-pyran-5-carboxylate</p>                      | 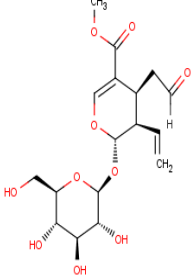  |
| <p>RASE0095</p> <p>[22]</p>   | <p>Nβ-Methylraumacline</p> | <p>Cell Suspension Culture</p> | <p>(1S,12S,13S,14R,17S,18S)-17-ethyl-3,20-dimethyl-15-oxa-3,20-diazapentacyclo[10.7.1.0<sup>2,10</sup>.0<sup>4,9</sup>.0<sup>13,18</sup>]jicosa-2(10),4(9),5,7-tetraen-14-ol</p> |   |
| <p>RASE0096</p> <p>[4,7]</p>  | <p>Tetrahydroalstonine</p> | <p>Hairy Root culture</p>      | <p>(19α)-16,17-didehydro- 19-methyloxayohimban- 16-carboxylic acid methyl ester</p>                                                                                              |  |

|                              |                                                               |                               |                                                                                                                                                                                                              |                                                                                      |
|------------------------------|---------------------------------------------------------------|-------------------------------|--------------------------------------------------------------------------------------------------------------------------------------------------------------------------------------------------------------|--------------------------------------------------------------------------------------|
| <p>RASE0097<br/>[4,5,23]</p> | <p>19(S),20(R)-<br/>dihydroperaksi<br/>ne</p>                 | <p>Hairy Root<br/>culture</p> | <p>[(1S,12S,13R,15R,16S)-15-<br/>(hydroxymethyl)-16-methyl-3,17-<br/>diazapentacyclo[12.3.1.0<sup>2,10</sup>.0<sup>4,9</sup>.0<sup>12,17</sup>]<br/>octadeca-2(10),4(9),5,7-tetraen-13-<br/>yl]methanol</p>  | 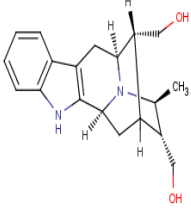  |
| <p>RASE0098<br/>[4,5,23]</p> | <p>19(S),20(R)-<br/>dihydroperaksi<br/>ne-17-al</p>           | <p>Hairy Root<br/>culture</p> | <p>(1S,12S,13R,15R,16S)-15-(hydroxymethyl)-<br/>16-methyl-3,17-<br/>diazapentacyclo[12.3.1.0<sup>2,10</sup>.0<sup>4,9</sup>.0<sup>12,17</sup>]<br/>octadeca-2(10),4(9),5,7-tetraene-13-<br/>carbaldehyde</p> |   |
| <p>RASE0099<br/>[4,5,23]</p> | <p>10-Hydroxy-<br/>19(S),20(R)-<br/>dihydroperaksi<br/>ne</p> | <p>Hairy Root<br/>culture</p> | <p>(1S,12S,13R,15R,16S)-13,15-<br/>bis(hydroxymethyl)-16-methyl-3,17-<br/>diazapentacyclo[12.3.1.0<sup>2,10</sup>.0<sup>4,9</sup>.0<sup>12,17</sup>]<br/>octadeca-2(10),4(9),5,7-tetraen-7-ol</p>            |  |

|                              |                                                         |                                                   |                                                                                                                                                                                                                                              |                                                                                       |
|------------------------------|---------------------------------------------------------|---------------------------------------------------|----------------------------------------------------------------------------------------------------------------------------------------------------------------------------------------------------------------------------------------------|---------------------------------------------------------------------------------------|
| <p>RASE0100<br/>[23]</p>     | <p>19(S),20(R)-<br/>(O)-<br/>Acetylpreperak<br/>ine</p> | <p>Hairy Root<br/>culture</p>                     | <p>[(1S,12S,13R,15R,16S)-15-formyl-16-<br/>methyl-3,17-<br/>diazapentacyclo[12.3.1.0<sup>2,10</sup>.0<sup>4,9</sup>.0<sup>12,17</sup>]<br/>]octadeca-2(10),4(9),5,7-tetraen-13-<br/>yl]methyl acetate</p>                                    | 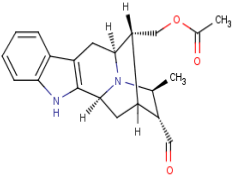   |
| <p>RASE0101<br/>[11]</p>     | <p>Reserpoxidine</p>                                    | <p>Stem,<br/>Leaves,<br/>Roots, Root<br/>bark</p> | <p>Methyl (1R,15S,17R,18R,19S,20S)-6,18-<br/>dimethoxy-13-oxo-17-(3,4,5-<br/>trimethoxybenzoyloxy)-3,13-diazapentacyclo[11.8.0.0<sup>2,10</sup>.0<sup>4,9</sup>.0<sup>15,20</sup>]<br/>]hencosa-2(10),4,6,8-tetraene-19-<br/>carboxylate</p> |    |
| <p>RASE0102<br/>[4]</p>      | <p>12-<br/>Hydroxyajmali<br/>ne</p>                     | <p>Hairy Root<br/>culture</p>                     | <p>13-ethyl-8-methyl-8,15-<br/>diazahexacyclo[14.2.1.0<sup>1,9</sup>.0<sup>2,7</sup>.0<sup>10,15</sup>.0<sup>12,17</sup>]<br/>]nonadeca-2(7),3,5-triene-<br/>6,14,18-triol</p>                                                               |    |
| <p>RASE0103<br/>[4,8,11]</p> | <p>3-Epi-alpha-<br/>yohimbine</p>                       | <p>Hairy Root<br/>culture</p>                     | <p>Methyl (1R,15S,18S,19S,20S)-18-hydroxy-<br/>3,13-<br/>diazapentacyclo[11.8.0.0<sup>2,10</sup>.0<sup>4,9</sup>.0<sup>15,20</sup>]<br/>]hencosa-2(10),4,6,8-tetraene-19-<br/>carboxylate</p>                                                |  |

|                      |                                       |                           |                                                                                                                                                                                                             |                                                                                       |
|----------------------|---------------------------------------|---------------------------|-------------------------------------------------------------------------------------------------------------------------------------------------------------------------------------------------------------|---------------------------------------------------------------------------------------|
| RASE0104<br>[4]      | 18-beta-hydroxy-3-epi-alpha-yohimbine | Hairy Root culture        | Methyl (1S,15R,17S,18S,19R,20R)-17,18-dihydroxy-3,13-diazapentacyclo[11.8.0.0 <sup>2,10</sup> .0 <sup>4,9</sup> .0 <sup>15,20</sup> ]]henicosa-2(10),4,6,8-tetraene-19-carboxylate                          | 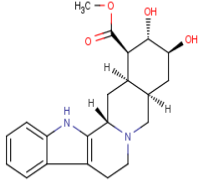   |
| RASE0105<br>[4,33]   | 17-O-acetyl-ajmaline                  | Hairy Root culture, Roots | (1R,9R,10S,12R,13S,14R,16S)-18-(acetyloxy)-13-ethyl-14-hydroxy-8-methyl-8,15-diazahexacyclo[14.2.1.0 <sup>1,9</sup> .0 <sup>2,7</sup> .0 <sup>10,15</sup> .0 <sup>12,17</sup> ]]nonadeca-2,4,6-trien-15-ium |    |
| RASE0106<br>[4,5,18] | Strictosidine                         | Hairy Root culture        | Methyl(2S,3R,4S)-3-ethenyl-4-[[[(1S)-2,3,4,9-tetrahydro-1H-pyrido[3,4-b]indol-1-yl]methyl]-2-[(2S,3R,4S,5S,6R)-3,4,5-trihydroxy-6-(hydroxymethyl)oxan-2-yl]oxy-3,4-dihydro-2H-pyran-5-carboxylate           |    |
| RASE0107<br>[4]      | Strictosidine lactam                  | Hairy Root culture        | 19-ethenyl-18-[[[3,4,5-trihydroxy-6-(hydroxymethyl)oxan-2-yl]oxy]-17-oxa-3,13-diazapentacyclo[11.8.0.0 <sup>2,10</sup> .0 <sup>4,9</sup> .0 <sup>15,20</sup> ]]henicosa-2(10),4(9),5,7,15-pentaen-14-one    |  |

|                 |              |              |                                                                                                                                                                               |                                                                                       |
|-----------------|--------------|--------------|-------------------------------------------------------------------------------------------------------------------------------------------------------------------------------|---------------------------------------------------------------------------------------|
| RASE0108<br>[7] | Eburnamonine | Cell culture | (15S,19S)-15-ethyl-1,11-diazapentacyclo[9.6.2.0 <sup>2,7</sup> .0 <sup>8,18</sup> .0 <sup>15,19</sup> ]nonadeca-2,4,6,8(18)-tetraen-17-one                                    | 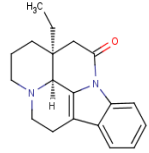   |
| RASE0109<br>[7] | Stemmadenine | Cell culture | Hydroxymethyl (16Z)-16-ethylidene-4-methyl-4,14-diazatetracyclo[12.2.2.0 <sup>3,11</sup> .0 <sup>5,10</sup> ]octadeca-3(11),5,7,9-tetraene-2-carboxylate                      |    |
| RASE0110<br>[7] | Akuammigine  | Cell culture | Methyl (1R,15S,16S,20S)-16-methyl-17-oxa-3,13-diazapentacyclo[11.8.0.0 <sup>2,10</sup> .0 <sup>4,9</sup> .0 <sup>15,20</sup> ]henicosa-2(10),4,6,8,18-pentaene-19-carboxylate |    |
| RASE0111<br>[7] | Gardnerine   | Cell culture | [(1S,15E)-15-ethylidene-6-methoxy-3,17-diazapentacyclo[12.3.1.0 <sup>2,10</sup> .0 <sup>4,9</sup> .0 <sup>12,17</sup> ]octadeca-2(10),4(9),5,7-tetraen-13-yl]methanol         |  |



|                 |                      |                     |                                                                                                                                                                                 |                                                                                       |
|-----------------|----------------------|---------------------|---------------------------------------------------------------------------------------------------------------------------------------------------------------------------------|---------------------------------------------------------------------------------------|
| RASE0112<br>[7] | 16-<br>Epigardnerine | Cell culture        | [(1S,12S,14S)-15-ethylidene-6-methoxy-3,17-diazapentacyclo[12.3.1.0 <sup>2,10</sup> .0 <sup>4,9</sup> .0 <sup>12,17</sup> ]]octadeca-2(10),4(9),5,7-tetraen-13-yl]methanol      | 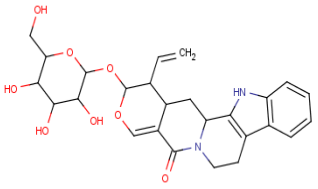   |
| RASE0113<br>[7] | Isosandwicine        | Roots, Cell culture | 13-ethyl-8-methyl-8,15-diazahexacyclo[14.2.1.0 <sup>1,9</sup> .0 <sup>2,7</sup> .0 <sup>10,15</sup> .0 <sup>12,17</sup> ]]nonadeca-2(7),3,5-triene-14,18-diol                   |    |
| RASE0114<br>[7] | Rauniticine          | Cell culture        | Methyl (1S,15S,16R,20S)-16-methyl-17-oxa-3,13-diazapentacyclo[11.8.0.0 <sup>2,10</sup> .0 <sup>4,9</sup> .0 <sup>15,20</sup> ]]heneicosa-2(10),4,6,8,18-pentaene-19-carboxylate |    |
| RASE0115<br>[7] | Sandwicine           | Roots, Cell culture | (9R,14S)-13-ethyl-8-methyl-8,15-diazahexacyclo[14.2.1.0 <sup>1,9</sup> .0 <sup>2,7</sup> .0 <sup>10,15</sup> .0 <sup>12,17</sup> ]]nonadeca-2(7),3,5-triene-14,18-diol          |  |

|                         |                                |                     |                                                                                                                                                                                                          |                                                                                       |
|-------------------------|--------------------------------|---------------------|----------------------------------------------------------------------------------------------------------------------------------------------------------------------------------------------------------|---------------------------------------------------------------------------------------|
| <p>RASE0116<br/>[7]</p> | <p>Vincoside<br/>lactam</p>    | <p>Cell culture</p> | <p>19-ethenyl-18-[[3,4,5-trihydroxy-6-(hydroxymethyl)oxan-2-yl]oxy]-17-oxa-3,13-diazapentacyclo[11.8.0.0<sup>2,10</sup>.0<sup>4,9</sup>.0<sup>15,20</sup>]]henicosa-2(10),4(9),5,7,15-pentaen-14-one</p> | 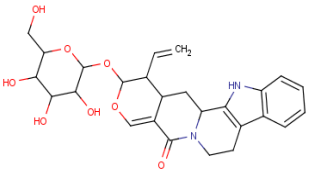   |
| <p>RASE0117<br/>[7]</p> | <p>Alpha-yohimbine</p>         | <p>Cell culture</p> | <p>Methyl (1S,15S,18S,19S,20S)-18-hydroxy-3,13-diazapentacyclo[11.8.0.0<sup>2,10</sup>.0<sup>4,9</sup>.0<sup>15,20</sup>]]henicosa-2(10),4,6,8-tetraene-19-carboxylate</p>                               |    |
| <p>RASE0118<br/>[7]</p> | <p>Beta-yohimbine</p>          | <p>Cell culture</p> | <p>Methyl (1S,15R,18R,19R,20S)-18-hydroxy-3,13-diazapentacyclo[11.8.0.0<sup>2,10</sup>.0<sup>4,9</sup>.0<sup>15,20</sup>]]henicosa-2(10),4,6,8-tetraene-19-carboxylate</p>                               |    |
| <p>RASE0119<br/>[7]</p> | <p>17,21-O-Diacetyljmaline</p> | <p>Cell culture</p> | <p>(14S)-14-(acetyloxy)-13-ethyl-8-methyl-8,15-diazahexacyclo[14.2.1.0<sup>1,9</sup>.0<sup>2,7</sup>.0<sup>10,15</sup>.0<sup>12,17</sup>]]nonadeca-2(7),3,5-trien-18-yl acetate</p>                      |  |

|                  |                              |                         |                                                                                                                                                                                                                                      |  |
|------------------|------------------------------|-------------------------|--------------------------------------------------------------------------------------------------------------------------------------------------------------------------------------------------------------------------------------|--|
| RASE0120<br>[7]  | 21-O-Acetylvomilene          | Cell Culture            | (10S,13E,14S)-14-(acetyloxy)-13-ethylidene-8,15-diazahexacyclo[14.2.1.0 <sup>{1,9}</sup> .0 <sup>{2,7}</sup> .0 <sup>{10,15}</sup> .0 <sup>{12,17}</sup> ]nonadeca-2(7),3,5,8-tetraen-18-yl acetate                                  |  |
| RASE0121<br>[22] | 21-hydroxyraumacoline        | Cell Suspension Culture | (1S,12S,13S,14R,17S,18S)-17-ethyl-3-methyl-15-oxa-3,20-diazapentacyclo[10.7.1.0 <sup>{2,10}</sup> .0 <sup>{4,9}</sup> .0 <sup>{13,18}</sup> ]icosa-2(10),4(9),5,7-tetraene-14,16-diol                                                |  |
| RASE0122<br>[34] | Tubotaiwine                  | Hybrid Cell Culture     | Methyl 18-ethyl-8,14-diazapentacyclo[9.5.2.0 <sup>{1,9}</sup> .0 <sup>{2,7}</sup> .0 <sup>{14,17}</sup> ]octadeca-2,4,6,9-tetraene-10-carboxylate                                                                                    |  |
| RASE0123<br>[34] | 21-Hydroxysarpagan-glucoside | Hybrid Cell Culture     | (1S,12S,14S,15E,16R)-15-ethylidene-16-[[3,4,5-trihydroxy-6-(hydroxymethyl)oxan-2-yl]oxy]-3,17-diazapentacyclo[12.3.1.0 <sup>{2,10}</sup> .0 <sup>{4,9}</sup> .0 <sup>{12,17}</sup> ]octadeca-2(10),4(9),5,7-tetraene-13-carbaldehyde |  |

|                  |                               |                                              |                                                                                                                                                                                                                                          |  |
|------------------|-------------------------------|----------------------------------------------|------------------------------------------------------------------------------------------------------------------------------------------------------------------------------------------------------------------------------------------|--|
| RASE0124<br>[34] | 17-O-Acetyltrauglucine        | Hybrid Cell Culture                          | (1R,9R,13S,14R,16S)-13-ethyl-8-methyl-14-[[3,4,5-trihydroxy-6-(hydroxymethyl)oxan-2-yl]oxy}-8,15-diazahexacyclo[14.2.1.0 <sup>1,9</sup> .0 <sup>2,7</sup> .0 <sup>10,15</sup> .0 <sup>12,17</sup> ]nonadeca-2(7),3,5-trien-18-yl acetate |  |
| RASE0125<br>[34] | 17-O-Acetylnortetraphyllicine | Hybrid Cell Culture, Cell Suspension Culture | (1R,9R,13E,16S)-13-ethylidene-8,15-diazahexacyclo[14.2.1.0 <sup>1,9</sup> .0 <sup>2,7</sup> .0 <sup>10,15</sup> .0 <sup>12,17</sup> ]nonadeca-2(7),3,5-trien-18-yl acetate                                                               |  |
| RASE0126<br>[34] | 17-O-Acetyltetraphyllicine    | Hybrid Cell Culture, Cell Suspension Culture | (1R,9R,13E,16S)-13-ethylidene-8-methyl-8,15-diazahexacyclo[14.2.1.0 <sup>1,9</sup> .0 <sup>2,7</sup> .0 <sup>10,15</sup> .0 <sup>12,17</sup> ]nonadeca-2(7),3,5-trien-18-yl acetate                                                      |  |
| RASE0127<br>[34] | Suaveoline                    | Hybrid Cell Culture                          | (1S,12S)-17-ethyl-3-methyl-3,15,20-triazapentacyclo[10.7.1.0 <sup>2,10</sup> .0 <sup>4,9</sup> .0 <sup>13,18</sup> ]icosa-2(10),4(9),5,7,13,15,17-heptaene                                                                               |  |

|                  |                    |                     |                                                                                                                                                                                                               |                                                                                       |
|------------------|--------------------|---------------------|---------------------------------------------------------------------------------------------------------------------------------------------------------------------------------------------------------------|---------------------------------------------------------------------------------------|
| RASE0128<br>[34] | Macrophylline      | Hybrid Cell Culture | 2-{20-methyl-3,15,20-triazapentacyclo[10.7.1.0 <sup>2,10</sup> .0 <sup>4,9</sup> .0 <sup>13,18</sup> ]}jicosa-2(10),4(9),5,7,13,15,17-heptaen-17-yl}ethan-1-ol                                                | 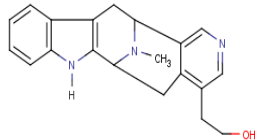   |
| RASE0129<br>[34] | Rhazinilam         | Hybrid Cell Culture | (12R)-12-ethyl-8,16-diazatetracyclo[10.6.1.0 <sup>2,7</sup> .0 <sup>16,19</sup> ]}nadaeca-1(19),2(7),3,5,17-pentaen-9-one                                                                                     |    |
| RASE0130<br>[34] | Acetylcorynanthine | Roots               | Methyl (1S,15R,18S,19S,20S)-18-(acetyloxy)-3,13-diazapentacyclo[11.8.0.0 <sup>2,10</sup> .0 <sup>4,9</sup> .0 <sup>15,20</sup> ]}henicosa-2(10),4(9),5,7-tetraene-19-carboxylate                              |   |
| RASE0131<br>[34] | Raunescine         | Roots               | Methyl (1R,15S,17R,18R,19S,20S)-18-hydroxy-17-(3,4,5-trimethoxybenzoyloxy)-3,13-diazapentacyclo[11.8.0.0 <sup>2,10</sup> .0 <sup>4,9</sup> .0 <sup>15,20</sup> ]}henicosa-2(10),4,6,8-tetraene-19-carboxylate |  |

|                            |                        |              |                                                                                                                                                                                                                  |                                                                                       |
|----------------------------|------------------------|--------------|------------------------------------------------------------------------------------------------------------------------------------------------------------------------------------------------------------------|---------------------------------------------------------------------------------------|
| <p>RASE0132<br/>[27]</p>   | <p>Isosandwicimine</p> | <p>Roots</p> | <p>(1R,9R,10S,12R,13R,14S,16S,18S)-13-ethyl-18-hydroxy-8-methyl-8,15-diazahexacyclo[14.2.1.0<sup>{1,9}</sup>.0<sup>{2,7}</sup>.0<sup>{10,15}</sup>.0<sup>{12,17}</sup>]nonadeca-2(7),3,5-trien-14-yl acetate</p> | 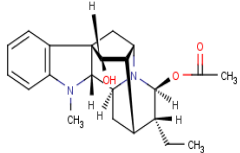   |
| <p>RASE0133<br/>[27]</p>   | <p>Seredine</p>        | <p>Roots</p> | <p>Methyl 18-hydroxy-6,7-dimethoxy-3,13-diazapentacyclo[11.8.0.0<sup>{2,10}</sup>.0<sup>{4,9}</sup>.0<sup>{15,20}</sup>]henicosa-2(10),4(9),5,7-tetraene-19-carboxylate</p>                                      |    |
| <p>RASE0134<br/>[8]</p>    | <p>Ajmalicine</p>      | <p>Roots</p> | <p>Methyl (1S,15R,16S,18S,20R)-18-hydroxy-16-methyl-17-oxa-3,13-diazapentacyclo[11.8.0.0<sup>{2,10}</sup>.0<sup>{4,9}</sup>.0<sup>{15,20}</sup>]henicosa-2(10),4(9),5,7-tetraene-3-carboxylate</p>               |    |
| <p>RASE0135<br/>[8,27]</p> | <p>Ajmalinimine</p>    | <p>Roots</p> | <p>4-acetyl-13-ethyl-14-hydroxy-8-methyl-8,15-diazahexacyclo[14.2.1.0<sup>{1,9}</sup>.0<sup>{2,7}</sup>.0<sup>{10,15}</sup>.0<sup>{12,17}</sup>]nonadeca-2,4,6-trien-18-yl acetate</p>                           |  |

|                            |                         |              |                                                                                                                                                                                                        |                                                                                       |
|----------------------------|-------------------------|--------------|--------------------------------------------------------------------------------------------------------------------------------------------------------------------------------------------------------|---------------------------------------------------------------------------------------|
| <p>RASE0136</p> <p>[8]</p> | <p>Raugalline</p>       | <p>Roots</p> | <p>(9R,14R)-13-ethyl-8-methyl-8,15-diazahexacyclo[14.2.1.0<sup>{1,9}</sup>.0<sup>{2,7}</sup>.0<sup>{10,15}</sup>.0<sup>{12,17}</sup>]nonadeca-2,4,6-triene-14,18-diol</p>                              | 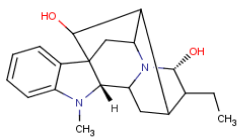   |
| <p>RASE0137</p> <p>[8]</p> | <p>Perakenine</p>       | <p>Roots</p> | <p>13-ethyl-8-methyl-19-oxa-8,15-diazahexacyclo[14.3.1.0<sup>{1,9}</sup>.0<sup>{2,7}</sup>.0<sup>{10,15}</sup>.0<sup>{12,17}</sup>]icosa-2(7),3,5-trien-18-ol</p>                                      |    |
| <p>RASE0138</p> <p>[8]</p> | <p>Serpine</p>          | <p>Roots</p> | <p>Methyl 18-hydroxy-3,13-diazapentacyclo[11.8.0.0<sup>{2,10}</sup>.0<sup>{4,9}</sup>.0<sup>{15,20}</sup>]henicosa-2(10),4(9),5,7-tetraene-19-carboxylate</p>                                          |    |
| <p>RASE0139</p> <p>[8]</p> | <p>Acetylajmalicine</p> | <p>Roots</p> | <p>Methyl (1S,15R,16S,18R,20R)-18-(acetyloxy)-16-methyl-17-oxa-3,13-diazapentacyclo[11.8.0.0<sup>{2,10}</sup>.0<sup>{4,9}</sup>.0<sup>{15,20}</sup>]henicosa-2(10),4(9),5,7-tetraene-3-carboxylate</p> |  |

|                            |                                   |                                        |                                                                                                                                                                                                           |                                                                                      |
|----------------------------|-----------------------------------|----------------------------------------|-----------------------------------------------------------------------------------------------------------------------------------------------------------------------------------------------------------|--------------------------------------------------------------------------------------|
| <p>RASE0140<br/>[8]</p>    | <p>Acetylsandwic<br/>oline</p>    | <p>Roots</p>                           | <p>(2S)-2-[(1S,2R,10R,12S,14R,17S)-17-(acetyloxy)-3,16-dimethyl-3,16-diazapentacyclo[10.3.1.1<sup>10,13</sup>.0<sup>2,10</sup>.0<sup>4,9</sup>]]heptadeca-4(9),5,7-trien-14-yl]-2-methylbutyl acetate</p> | 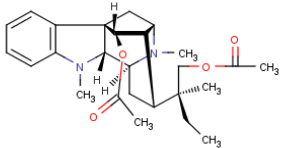  |
| <p>RASE0141<br/>[8]</p>    | <p>Acetylsandwic<br/>olidine</p>  | <p>Roots</p>                           | <p>(9S,10S,12R,13S,14R,18S)-14-ethyl-13-methoxy-8-methyl-8,15-diazahexacyclo[14.2.1.0<sup>1,9</sup>.0<sup>2,7</sup>.0<sup>10,15</sup>.0<sup>12,17</sup>]]nonadeca-2(7),3,5-trien-18-yl acetate</p>        |   |
| <p>RASE0142<br/>[5,35]</p> | <p>Dehydrogeisso<br/>schizine</p> | <p>Cell<br/>Suspension<br/>Culture</p> | <p>(2S,4S,5E)-5-ethylidene-4-(1-methoxy-1,3-dioxopropan-2-yl)-7<sup>1</sup>,17-diazatetracyclo[8.7.0.0<sup>2,7</sup>.0<sup>11,16</sup>]]heptadeca-1(10),6,11,13,15-pentaen-7-ylum</p>                     |  |



|                          |                                                                      |                                        |                                                                                                                                                                                                                                 |                                                                                      |
|--------------------------|----------------------------------------------------------------------|----------------------------------------|---------------------------------------------------------------------------------------------------------------------------------------------------------------------------------------------------------------------------------|--------------------------------------------------------------------------------------|
| <p>RASE0143<br/>[5]</p>  | <p>19(S),20(R)-<br/>dihydroperaksi<br/>ne-17,21-al</p>               | <p>Cell<br/>Suspension<br/>Culture</p> | <p>(1S,12S,15R,16S)-16-methyl-3,17-<br/>diazapentacyclo[12.3.1.0<sup>2,10</sup>.0<sup>4,9</sup>.0<sup>{12,17}</sup>]<br/>octadeca-2(10),4,6,8-tetraene-13,15-<br/>dicarbaldehyde</p>                                            | 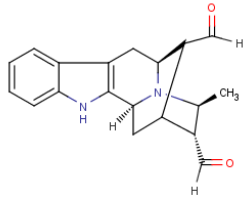  |
| <p>RASE0144<br/>[33]</p> | <p>(+)-17R-O-<br/>(3',4',5'-<br/>trimethoxybenz<br/>oyl)ajmaline</p> | <p>Roots</p>                           | <p>(13S,14R)-13-ethyl-14-hydroxy-8-methyl-<br/>8,15-<br/>diazahexacyclo[14.2.1.0<sup>{1,9}</sup>.0<sup>{2,7}</sup>.0<sup>{10,15}</sup>.0<sup>{12,17}</sup>]<br/>nonadeca-2(7),3,5-trien-18-<br/>yl 3,4,5-trimethoxybenzoate</p> |   |
| <p>RASE0145<br/>[21]</p> | <p>4,21-<br/>secoajmaline</p>                                        | <p>Cell Culture</p>                    | <p>14-[(2S)-1-hydroxybutan-2-yl]-3-methyl-<br/>3,16-<br/>diazapentacyclo[10.3.1.1<sup>{10,13}</sup>.0<sup>{2,10}</sup>.<br/>0<sup>{4,9}</sup>]heptadeca-4(9),5,7-trien-17-ol</p>                                                |  |

|                  |                  |       |                                                                                                                                                                                    |                                                                                     |
|------------------|------------------|-------|------------------------------------------------------------------------------------------------------------------------------------------------------------------------------------|-------------------------------------------------------------------------------------|
| RASE0146<br>[27] | Ajmalicine       | Roots | Methyl (4S,8S,9R)-8-methyl-7-oxa-11,21-diazatetracyclo[12.7.0.0 <sup>4,9</sup> .0 <sup>15,20</sup> ]he<br>nicosa-1(14),5,15(20),16,18-pentaene-5-<br>carboxylate                   | 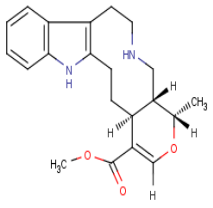 |
| RASE0147<br>[27] | Acetylajmalicine | Roots | Methyl (4S,8S,9R)-11-acetyl-8-methyl-7-<br>oxa-11,21-<br>diazatetracyclo[12.7.0.0 <sup>4,9</sup> .0 <sup>15,20</sup> ]he<br>nicosa-1(14),5,15(20),16,18-pentaene-5-<br>carboxylate |  |

## REFERENCES

1. Madhusudanan K, Banerjee S, Khanuja S, Chattopadhyay S (2008) Analysis of hairy root culture of *Rauvolfia serpentina* using direct analysis in real time mass spectrometric technique. *Biomedical Chromatography* 22: 596–600. doi:10.1002/bmc.974.
2. Srivastava A, Tripathi A, Pandey R, Verma R, Gupta M (2006) Quantitative determination of reserpine, ajmaline, and ajmalicine in *Rauvolfia serpentina* by reversed-phase high-performance liquid chromatography. *Journal of Chromatographic Science* 44: 557–560. doi:10.1093/chromsci/44.9.557.
3. Varchi G, Battaglia A, Samorì C, Baldelli E, Danieli B, et al. (2005) Synthesis of Deserpidine from Reserpine. *Journal of Natural Products* 68: 1629–1631. doi:10.1021/np050179x.
4. Sheludko Y, Gerasimenko I, Kolshorn H, Stöckigt J (2002) New alkaloids of the sarpagine group from *Rauvolfia serpentina* hairy root culture. *Journal of Natural Products* 65: 1006–1010. doi:10.1021/np0200919.

5. Sun L, Ruppert M, Sheludko Y, Warzecha H, Zhao Y, et al. (2008) Purification, cloning, functional expression and characterization of perakine reductase: the first example from the AKR enzyme family, extending the alkaloidal network of the plant Rauwolfia. *Plant Molecular Biology* 67: 455–467. doi:10.1007/s11103-008-9331-7.
6. Yarnell E (2007) *Rauwolfia serpentina* Benth ex Kurz ( rauwolfia ), Apocynaceae and related species.
7. Gerasimenko I, Sheludko Y, Unger M, Stöckigt J (2001) Development of an efficient system for the separation of indole alkaloids by high performance liquid chromatography and its applications. *Phytochemical Analysis* 12: 96–103. doi:10.1002/pca.567.
8. Zaidi SSA (1986) Studies in the alkaloidal constituents of the roots of rauwolfia serpentina benth with particular regional variations and synthetic extensions of von braun (BrCN) reaction on alkaloidal and simpler organic bases. University of Karachi.
9. Wachsmuth O, Matusch R (2002) Anhydronium bases from Rauwolfia serpentina. *Phytochemistry* 61: 705–709. doi:10.1016/S0031-9422(02)00372-2.
10. Dassonneville L, Bonjean K, Colson P, Houssier C (1999) Stimulation of Topoisomerase II-Mediated DNA Cleavage by Three DNA-Intercalating Plant Alkaloids: Cryptolepine, Matadine, and Serpentine. *Biochemistry* 38: 7719–7726. doi:10.1021/bi990094t.
11. Mittal B, Meenakshi, Sharma A, Kumar V (2012) Phytochemical & Pharmacological Activity Of Rauwolfia Serpentina – A Review. *International Journal Of Ayurvedic And Herbal Medicine* 2: 427–434.
12. Itoh A, Kumashiro T, Yamaguchi M, Nagakura N, Mizushina Y, et al. (2005) Indole alkaloids and other constituents of Rauwolfia serpentina. *Journal of Natural Products* 68: 848–852. doi:10.1021/np058007n.
13. Dey A, De J (2011) Ethnobotanical aspects of Rauwolfia serpentina ( L ). Benth. ex Kurz. in India, Nepal and Bangladesh. *Journal of Medicinal Plants Research* 5: 144–150.
14. Phillips K, Horst R, Koszewski N, Simon R (2012) Vitamin d(4) in mushrooms. *PloS One* 7: 1–10. doi:10.1371/journal.pone.0040702.
15. India Herbs - ancient remedies for modern times. (2012). Available:<http://www.cardiofy.com/index.htm>.
16. GLOBinMeD-Global Information Hub On Integrated Medicine. (2012). Available:[http://www.globinmed.com/index.php?option=com\\_content&view=article&id=79110:rauwolfia-serpentina-benth&catid=720:r#6](http://www.globinmed.com/index.php?option=com_content&view=article&id=79110:rauwolfia-serpentina-benth&catid=720:r#6).

17. A database on antidiabetic plants. (2012). Available:<http://herbalmedicinalplants.org/index.php>.
18. Ruppert M, Panjekar S, Barleben L, Stöckigt J (2006) Heterologous expression, purification, crystallization and preliminary X-ray analysis of raucaffricine glucosidase, a plant enzyme specifically involved in Rauwolfia alkaloid biosynthesis. *Acta Crystallographica Section F Structural Biology and Crystallization Communications* 62: 257–260. doi:10.1107/S174430910600457X.
19. Warzecha H, Obitz P, Sto J (1999) Purification, partial amino acid sequence and structure of the product of raucaffricine-O- $\beta$ -D-glucosidase from plant cell cultures of Rauwolfia serpentina. *Phytochemistry* 50: 1099–1109. doi:10.1016/S0031-9422(98)00689-X.
20. Sheludko Y, Gerasimenko I, Kolshorn H, Stöckigt J (2002) Isolation and structure elucidation of a new indole alkaloid from Rauwolfia serpentina hairy root culture: the first naturally occurring alkaloid of the raumacline group. *Planta Medica* 68: 435–439. doi:10.1055/s-2002-32074.
21. Bailey PD, Beard M a., Dang HPT, Phillips TR, Price R a., et al. (2008) Debenzylation using catalytic hydrogenolysis in trifluoroethanol, and the total synthesis of (–)-raumacline. *Tetrahedron Letters* 49: 2150–2153. doi:10.1016/j.tetlet.2008.01.104.
22. Obitz P, Endreb S, Joachim S (1995) Enzymatic biosynthesis of raumacline. *Phytochemistry* 40: 1407–1417. doi:10.1016/0031-9422(95)00503-Y.
23. Edwankar R, Edwankar C, Deschamps J, Cook J (2011) Regiospecific, enantiospecific total synthesis of C-19 methyl substituted sarpagine alkaloids dihydroperaksine-17-al and dihydroperaksine. *Organic Letters* 13: 5216–5219. doi:10.1021/ol202101p.
24. Mattern-Dogru E, Ma X, Hartmann J, Decker H, Stöckigt J (2002) Potential active-site residues in polynneuridine aldehyde esterase, a central enzyme of indole alkaloid biosynthesis, by modelling and site-directed mutagenesis. *European Journal of Biochemistry* 269: 2889–2896. doi:10.1046/j.1432-1033.2002.02956.x.
25. Bayer A, Ma X, Stöckigt J (2004) Acetyltransfer in natural product biosynthesis--functional cloning and molecular analysis of vinorine synthase. *Bioorganic & Medicinal Chemistry* 12: 2787–2795. doi:10.1016/j.bmc.2004.02.029.
26. Ganugapati J, Baldwa A, Lalani S (2012) Docking Studies of Rauwolfia Serpentina Alkaloids as Insulin Receptor Activators. *International Journal of Computer Applications* 43: 32–37. doi:10.5120/6173-8600.
27. Haider SI (1986) Extended studies in the alkaloidal constituents of Rauwolfia serpentina from thailand and synthetic extensions of Von braun (BrCN) reaction on alkaloidal and simpler organic bases University of Karachi.

28. Reddy MP, HariChandana P, Reddy KHV (n.d.) Isolation and characterization of Indole alkaloids from Rauwolfia serpentine. Quality Standards of Indian Medicinal Plants.
29. Vakil R (1949) A Clinical trial of Rauwolfia serpentina in essential hypertension. *British Heart Journal* 11: 350–355. doi:10.1136/hrt.11.4.350.
30. Ghosh B, Basu R (1955) A sterol (serposterol) for use in mental cases from Rauwolfia Serpentina. *Naturwissenschaften* 42: 130. doi:10.1007/BF00589414.
31. Arend J, Warzecha H, Stöckigt J (2000) Hydroquinone: O-glucosyltransferase from cultivated Rauwolfia cells: enrichment and partial amino acid sequences. *Phytochemistry* 53: 187–193. doi:10.1016/S0031-9422(99)00539-7.
32. Arend J, Warzecha H, Hefner T, Stöckigt J (2001) Utilizing genetically engineered bacteria to produce plant-specific glucosides. *Biotechnology and Bioengineering* 76: 126–131. doi:10.1002/bit.1152.
33. Hanhinen P, Lounasmaa M (2001) Revision of the structure of ajmalimine. *Journal of Natural Products* 64: 686–687. doi:10.1021/np000618m.
34. Stöckigt J, Sheludk Y, Unger M, Gerasimenko I, Warzecha H, et al. (2002) High-performance liquid chromatographic, capillary electrophoretic and capillary electrophoretic-electrospray ionisation mass spectrometric analysis of selected alkaloid groups. *Journal of Chromatography A* 967: 85–113. doi:10.1016/S0021-9673(02)00037-7.
35. Dogru E, Warzecha H, Seibel F, Haebel S, Lottspeich F, et al. (2000) The gene encoding polynneuridine aldehyde esterase of monoterpene indole alkaloid biosynthesis in plants is an ortholog of the a / b hydrolase super family. *European Journal of Biochemistry* 267: 1397–1406. doi:10.1046/j.1432-1327.2000.01136.x.
