# Supplementary material for: Prospecting for Novel Plant-Derived Molecules of Rauvolfia serpentina as Inhibitors of Aldose Reductase, a Potent Drug Target for Diabetes and Its Complications
Source: PubMed Central journal article supplement (PMC3629236; doi:10.1371/journal.pone.0061327), 2013-04-17
Supplement: pone.0061327.s004.pdf [file pone.0061327.s004.pdf]

**Table S2. Nine *R. serpentina* PDMs with desirable binding affinities.** Results of docking runs for the nine PDMs with binding affinity consistently better than the positive control (-10.7 kcal/mol), against Aldose Reductase (PDB ID: 1US0).

| Ligand   | PDM Name                              | Binding affinity(kcal/mol)[number of modes] |            |            |            |            |
|----------|---------------------------------------|---------------------------------------------|------------|------------|------------|------------|
|          |                                       | Run 1                                       | Run 2      | Run 3      | Run 4      | Run 5      |
| RASE0007 | Yohimbine                             | -11.1 [03]                                  | --         | -11.1 [01] | --         | --         |
| RASE0048 | Indobine                              | -11.0 [12]                                  | -11.0 [20] | -11.0 [20] | -11.1 [19] | -11.0 [14] |
| RASE0049 | Indobinine                            | -11.1 [14]                                  | -11.0 [18] | -11.0 [10] | -11.0 [12] | -11.0 [14] |
| RASE0070 | Yohimbinic acid                       | --                                          | -11.6[01]  | -11.6[01]  | --         | -11.6[02]  |
| RASE0071 | Isorauhimbinic acid                   | --                                          | --         | -11.6[02]  | --         | --         |
| RASE0125 | 17-O-Acetyl-nortetraphyllicine        | -10.7[04]                                   | -10.7[04]  | -10.7[04]  | -10.6[05]  | -10.7[04]  |
| RASE0126 | 17-O-Acetyltetraphyllicine            | -10.9[03]                                   | -10.9[04]  | -10.9[03]  | -10.9[03]  | -10.9[03]  |
| RASE0142 | Dehydrogeissoschizine                 | -11.1 [01]                                  | -11.1 [01] | -11.1 [01] | -11.1 [01] | -11.1 [01] |
| RASE0143 | 19(S),20(R)-dihydroperaksine-17,21-al | -10.7[03]                                   | -10.7[03]  | -10.7[04]  | -10.7[02]  | -10.7[04]  |
