# Supplementary material for: Prospecting for Novel Plant-Derived Molecules of Rauvolfia serpentina as Inhibitors of Aldose Reductase, a Potent Drug Target for Diabetes and Its Complications
Source: PubMed Central journal article supplement (PMC3629236; doi:10.1371/journal.pone.0061327), 2013-04-17
Supplement: pone.0061327.s005.pdf [file pone.0061327.s005.pdf]

**Table S3. Hydrogen bonding pattern with critical residues (for best PDMs).** Details of critical interactions during MD simulations at every 0.5ns.

| <b>Best PDMs</b> | <b>0.5ns</b>     | <b>1.0ns</b>     | <b>1.5ns</b>     | <b>2.0ns</b>     | <b>2.5ns</b>     | <b>3.0ns</b>     | <b>3.5ns</b> | <b>4.0ns</b>     | <b>4.5ns</b>     | <b>5.0ns</b>     |
|------------------|------------------|------------------|------------------|------------------|------------------|------------------|--------------|------------------|------------------|------------------|
| RASE0048         | His110<br>Trp111 | His110<br>Trp111 | His110<br>Trp111 | His110<br>Trp111 | His110<br>Trp111 | His110<br>Trp111 | Cys298       | His110<br>Trp111 | His110<br>Trp111 | His110<br>Trp111 |
| RASE0049         | Trp20            | His110           | --               | --               | His110<br>Trp20  | His110<br>Trp111 | His110       | His110           | His110<br>Trp111 | His110<br>Trp111 |
| RASE0143         | His110           | His110<br>Trp111 | His110<br>Gln49  | Trp20            | --               | --               | --           | --               | --               | Gln49            |
