# Supplementary material for: Prospecting for Novel Plant-Derived Molecules of Rauvolfia serpentina as Inhibitors of Aldose Reductase, a Potent Drug Target for Diabetes and Its Complications
Source: PubMed Central journal article supplement (PMC3629236; doi:10.1371/journal.pone.0061327), 2013-04-17
Supplement: pone.0061327.s006.pdf [file pone.0061327.s006.pdf]

**Table S4. Binding affinities and hydrogen bond interactions for analogs of RASE0048.** Results of docking runs for ZINC analogs of indobine (RASE0048) with binding affinity consistently better as compared that of the positive control (-10.7 kcal/mol), against Aldose Reductase (PDB ID: 1US0). For few of the analogs, there were multiple modes/poses with desirable binding affinity. Results of docking runs of indobine are mentioned for comparison (highlighted). Among the analogs of RASE0048, data for the representative molecule chosen for MD analysis (ZINC04286771) is shown in bold.

| PDM_ID       | Mode No. | Binding affinity(kcal/mol)[number of modes] |           |           |           |           | Hydrogen interactions[bond length]                                         |                              |                                                                            |                              |                                                                            |
|--------------|----------|---------------------------------------------|-----------|-----------|-----------|-----------|----------------------------------------------------------------------------|------------------------------|----------------------------------------------------------------------------|------------------------------|----------------------------------------------------------------------------|
|              |          | Run 1                                       | Run 2     | Run 3     | Run 4     | Run 5     | Run 1                                                                      | Run 2                        | Run 3                                                                      | Run 4                        | Run 5                                                                      |
| RASE0048     | 1        | -11.0[12]                                   | -11.0[20] | -11.0[20] | -11.1[19] | -11.0[14] | Trp111[3.27]<br>His110 [2.94]                                              | Trp111[3.23]<br>His110[3.02] | Trp111[3.07]<br>His110[3.08]                                               | Trp111[3.14]<br>His110[3.11] | Trp111[3.08]<br>His110[3.00]                                               |
| ZINC08650120 | 1        | -11.2[14]                                   | -11.0[19] | -11.1[16] | -11.0[20] | -11.0[20] | Trp111[3.20]<br>His110 [2.96]                                              | Trp111[3.05]<br>His110[3.08] | Trp111[3.16]<br>His110[3.00]                                               | Trp111[3.11]<br>His110[3.10] | His110[3.06]                                                               |
| ZINC04286938 | 1        | -11.6[20]                                   | -11.6[16] | -11.6[20] | -11.4[20] | -11.6[16] | Trp111[2.94]                                                               | Trp111[3.05]<br>His110[3.12] | Trp111[2.98]                                                               | Nil                          | Trp111[3.22]<br>His110[3.03]                                               |
| ZINC04286938 | 2        | -10.8[20]                                   | --        | -10.9[20] | -11.2[20] | -11.1[16] | Trp111[3.30]<br>His110[3.15]<br>Tyr48[3.21]<br>Asp43[3.18]<br>Gln183[2.94] | --                           | Nil                                                                        | Trp111[3.00]                 | Nil                                                                        |
| ZINC04286938 | 3        | --                                          | --        | -10.7[20] | -10.7[20] | -10.7[16] | --                                                                         | --                           | Trp111[3.25]<br>His110[3.27]<br>Tyr48[3.27]<br>Asp43[3.17]<br>Gln183[3.02] | Nil                          | Nil                                                                        |
| ZINC04286938 | 4        | --                                          | --        | --        | --        | -10.7[16] | --                                                                         | --                           | --                                                                         | --                           | Trp111[3.22]<br>His110[3.15]<br>Tyr48[3.26]<br>Asp43[3.18]<br>Gln183[2.97] |
| ZINC08650118 | 1        | -11.3[20]                                   | -11.4[20] | -11.4[19] | -11.4[20] | -11.4[18] | His110[3.06]                                                               | Trp111[3.22]<br>His110[2.98] | Trp111[3.23]<br>His110[3.00]                                               | Trp111[3.26]<br>His110[2.97] | Trp111[3.35]<br>His110[3.02]                                               |
| ZINC08650118 | 2        | -10.7[20]                                   | -10.7[20] | -10.8[19] | -10.8[20] | -10.9[18] | His110[3.21]<br>Tyr48[2.80]                                                | Trp111[2.98]<br>His110[3.03] | Trp111[3.07]<br>Tyr48[2.98]                                                | His110[3.31]<br>Tyr48[2.95]  | Trp111[3.13]<br>Tyr48[3.05]                                                |

|                     |          |                  |                  |                  |                  |                  |                                                                            |                                                                            |                                                                                           |                                                                            |                                                                            |
|---------------------|----------|------------------|------------------|------------------|------------------|------------------|----------------------------------------------------------------------------|----------------------------------------------------------------------------|-------------------------------------------------------------------------------------------|----------------------------------------------------------------------------|----------------------------------------------------------------------------|
|                     |          |                  |                  |                  |                  |                  |                                                                            | Tyr48[3.25]<br>Asp43[3.15]<br>Gln183[3.06]                                 | Gln183[2.72]                                                                              |                                                                            | Gln183[2.81]<br>Thr113[3.15]                                               |
| ZINC08650118        | 3        | --               | --               | -10.7[19]        | -10.7[20]        | -10.8[18]        | --                                                                         | --                                                                         | Trp111[3.24]<br>His110[3.01]<br>Val47[3.34]<br>Tyr48[3.26]<br>Asp43[3.15]<br>Gln183[2.97] | Trp111[3.28]<br>His110[2.99]<br>Tyr48[3.26]<br>Asp43[3.18]<br>Gln183[2.95] | Trp111[3.24]<br>His110[3.05]<br>Tyr48[3.27]<br>Asp43[3.15]<br>Gln183[3.02] |
| <b>ZINC04286771</b> | <b>1</b> | <b>-11.4[20]</b> | <b>-11.4[20]</b> | <b>-11.4[20]</b> | <b>-11.3[19]</b> | <b>-11.4[16]</b> | <b>Trp111[3.07]<br/>His110[3.00]</b>                                       | <b>Trp111[3.01]<br/>His110[2.99]</b>                                       | <b>Trp111[3.11]<br/>His110[2.97]</b>                                                      | <b>Trp111[3.10]<br/>His110[2.95]</b>                                       | <b>Trp111[3.16]<br/>His110[2.99]</b>                                       |
| ZINC04286771        | 2        | -10.7[20]        | -10.7[20]        | -10.7[20]        | --               | -10.7[16]        | Nil                                                                        | Nil                                                                        | Nil                                                                                       | --                                                                         | Nil                                                                        |
| ZINC08650121        | 1        | -11.1[20]        | -11.0[19]        | -11.1[20]        | -10.9[20]        | -10.9[19]        | Trp111[2.96]<br>His110[2.96]                                               | Trp111[3.23]<br>His110[3.00]                                               | Trp111[2.89]<br>His110[2.93]                                                              | Trp111[3.22]<br>His110[3.03]                                               | Trp111[3.28]<br>His110[3.01]                                               |
| ZINC08650121        | 2        | --               | --               | -10.7[20]        | --               | --               | --                                                                         | --                                                                         | Nil                                                                                       | --                                                                         | --                                                                         |
| ZINC04286761        | 1        | -11.1[20]        | -11.0[19]        | -11.0[20]        | -11.2[20]        | -11.1[19]        | Trp111[3.29]<br>His110[3.03]                                               | Trp111[3.29]<br>His110[3.05]                                               | Trp111[3.31]<br>His110[3.01]                                                              | Trp111[2.94]<br>His110[3.02]                                               | Trp111[3.31]<br>His110[3.01]                                               |
| ZINC04286761        | 2        | --               | -11.0[19]        | --               | --               | --               | --                                                                         | Trp111[3.14]<br>His110[3.03]                                               | --                                                                                        | --                                                                         | --                                                                         |
| ZINC03457470        | 1        | -11.3[20]        | -11.1[20]        | -11.3[20]        | -11.2[20]        | -11.3[20]        | Trp111[3.12]<br>His110[2.95]                                               | Trp111[3.21]<br>His110[3.03]                                               | Trp111[3.18]<br>His110[3.00]                                                              | Trp111[3.03]<br>His110[3.05]                                               | Trp111[3.22]<br>His110[2.98]                                               |
| ZINC03457470        | 2        | -10.7[20]        | -10.7[20]        | -10.7[20]        | -11.1[20]        | -10.7[20]        | Nil                                                                        | Trp111[3.17]<br>His110[3.10]<br>Tyr48[3.27]<br>Asp43[3.22]<br>Gln183[3.05] | Trp111[3.18]<br>His110[3.11]<br>Tyr48[3.22]<br>Asp43[3.17]<br>Gln183[2.97]                | Trp111[3.23]<br>His110[2.98]                                               | Trp111[3.16]<br>His110[3.13]<br>Tyr48[3.25]<br>Asp43[3.19]<br>Gln183[3.00] |
| ZINC03457470        | 3        | -10.7[20]        | --               | --               | -10.8[20]        | --               | Trp111[3.19]<br>His110[3.10]<br>Tyr48[3.24]<br>Asp43[3.17]<br>Gln183[2.98] | --                                                                         | --                                                                                        | Trp111[3.17]<br>His110[3.11]<br>Tyr48[3.23]<br>Asp43[3.16]<br>Gln183[2.95] | --                                                                         |
| ZINC04286496        | 1        | -11.9[19]        | -11.7[15]        | -11.3[20]        | -11.7[19]        | -11.7[20]        | Trp111[3.12]<br>His110[3.10]                                               | Ser210[3.33]                                                               | Ser210[3.23]                                                                              | Trp111[2.95]<br>His110[3.10]                                               | Trp111[3.17]                                                               |

|              |   |           |           |           |           |           |                                                                            |                                                            |                              |                              |                                                                            |
|--------------|---|-----------|-----------|-----------|-----------|-----------|----------------------------------------------------------------------------|------------------------------------------------------------|------------------------------|------------------------------|----------------------------------------------------------------------------|
|              |   |           |           |           |           |           | Ser210[3.18]                                                               |                                                            |                              | Ser210[3.16]                 |                                                                            |
| ZINC04286496 | 2 | -10.9[19] | -11.2[15] | -11.1[20] | -11.5[19] | -10.9[20] | Thr113[3.09]<br>Trp111[3.01]<br>Tyr48[3.07]<br>Gln183[2.76]                | Trp111[3.12]<br>Ser159[2.44]                               | Trp111[3.18]<br>Ser159[2.44] | Nil                          | Ser159[2.39]                                                               |
| ZINC04286496 | 3 | -10.9[19] | -10.8[15] | --        | -11.1[19] | -10.8[20] | Nil                                                                        | His110[2.89]<br>Ser210[3.28]                               | --                           | Trp111[2.99]<br>Ser159[2.36] | Nil                                                                        |
| ZINC04286496 | 4 | -10.8[19] | -10.7[15] | --        | --        | -10.8[20] | Trp111[3.24]<br>His110[3.25]<br>Tyr48[3.23]<br>Asp43[3.15]<br>Gln183[2.99] | His110[3.10]<br>Tyr48[3.19]<br>Asp43[3.19]<br>Gln183[2.98] | --                           | --                           | His110[3.20, 3.20]<br>Tyr48[3.24]<br>Asp43[3.19]<br>Gln183[3.03]           |
| ZINC04286496 | 5 | -10.8[19] | --        | --        | --        | --        | Ser210[3.20]<br>Ser214[3.20]                                               | --                                                         | --                           | --                           | --                                                                         |
| ZINC03273473 | 1 | -11.3[19] | -11.3[15] | -11.3[17] | -11.0[17] | -11.3[15] | Trp111[2.99]<br>His110[3.02]                                               | Trp111[3.26]<br>His110[3.02]                               | Trp111[3.10]<br>His110[3.08] | Nil                          | Nil                                                                        |
| ZINC03273473 | 2 | -11.1[19] | -11.1[15] | --        | -10.9[17] | --        | Nil                                                                        | Trp111[2.81]                                               | --                           | Nil                          | Trp111[3.25]<br>His110[3.12]<br>Tyr48[3.22]<br>Asp43[3.18]<br>Gln183[2.95] |
| ZINC03273473 | 3 | -10.8[19] | --        | --        | --        | --        | His110[3.20]                                                               | --                                                         | --                           | --                           | --                                                                         |
| ZINC08649692 | 1 | -11.3[20] | -11.3[17] | -11.4[17] | -11.4[20] | -11.3[19] | Trp111[3.08]<br>His110[3.11]                                               | Trp111[3.03]<br>His110[3.16]                               | Trp111[3.08]<br>His110[3.15] | Trp111[3.22]<br>His110[3.12] | Trp111[3.32]<br>His110[3.08]                                               |
| ZINC08649692 | 2 | -11.2[20] | --        | --        | -11.3[20] | -10.7[19] | Trp111[3.17]<br>His110[3.02]                                               | Nil                                                        | Nil                          | Trp111[3.17]<br>His110[2.95] |                                                                            |
