# Supplementary material for: Prospecting for Novel Plant-Derived Molecules of Rauvolfia serpentina as Inhibitors of Aldose Reductase, a Potent Drug Target for Diabetes and Its Complications
Source: PubMed Central journal article supplement (PMC3629236; doi:10.1371/journal.pone.0061327), 2013-04-17
Supplement: pone.0061327.s007.pdf [file pone.0061327.s007.pdf]

**Table S5. Binding affinities and hydrogen bond interactions for analogs of RASE0049.** Results of docking runs for ZINC analogs of indobinine (RASE0049) with binding affinities consistently better than that of the positive control (-10.7 kcal/mol), against Aldose Reductase (PDB ID: 1US0). Results of docking runs of indobinine are mentioned for comparison (highlighted). Among the analogs of RASE0049, data for the representative molecule chosen for MD analysis (ZINC49016166) is shown in bold.

| PDM_ID              | Mode No. | Binding affinity(kcal/mol)[number of modes] |                  |                  |                  |                  | Hydrogen bond interactions[bond length]    |                                            |                                            |                                              |                                            |
|---------------------|----------|---------------------------------------------|------------------|------------------|------------------|------------------|--------------------------------------------|--------------------------------------------|--------------------------------------------|----------------------------------------------|--------------------------------------------|
|                     |          | Run 1                                       | Run 2            | Run 3            | Run 4            | Run 5            | Run 1                                      | Run 2                                      | Run 3                                      | Run 4                                        | Run 5                                      |
| RASE0049            | 1        | -11.1[14]                                   | -11.0[18]        | -11.0[10]        | -11.0[12]        | -11.0[14]        | Trp111[3.20]                               | Trp111[3.21]                               | Trp111[3.12]                               | Trp111[3.12]                                 | Trp111[3.09]                               |
| ZINC14517206        | 1        | -11.1[13]                                   | -11.1[13]        | -11.1[13]        | -11.1[15]        | -11.1[13]        | Trp111[3.14]                               | Trp111[3.18]                               | Trp111[3.14]                               | Trp111[3.17]                                 | Trp111[3.09]                               |
| ZINC66777285        | 1        | -10.7[15]                                   | -10.8[17]        | --               | --               | --               | Nil                                        | Nil                                        | --                                         | --                                           | --                                         |
| ZINC66777292        | 1        | -10.7[18]                                   | --               | -10.7[18]        | --               | -10.7[17]        | Trp111[3.07]                               | Asn160[2.89]                               | Asn160[2.89]                               | Asn160[2.89]                                 | Trp111[3.01]<br>His110[3.03]               |
| <b>ZINC49016166</b> | <b>1</b> | <b>-11.0[09]</b>                            | <b>-11.1[10]</b> | <b>-11.1[11]</b> | <b>-11.1[16]</b> | <b>-11.1[13]</b> | <b>Trp111[3.00]</b><br><b>His110[2.91]</b> | <b>Trp111[2.99]</b><br><b>His110[2.90]</b> | <b>Trp111[2.98]</b><br><b>His110[2.90]</b> | <b>Trp111[2.99]</b><br><b>His110[2.88]</b>   | <b>Trp111[2.98]</b><br><b>His110[2.91]</b> |
| ZINC04286775        | 1        | -11.3[13]                                   | -11.4[11]        | -11.3[12]        | -11.3[10]        | -11.3[14]        | Trp111[3.12]<br>Asn160[2.91]               | Trp111[3.18]<br>Asn160[2.93]               | Trp111[3.18]<br>Asn160[2.91]               | Trp111[3.12]<br>His110[3.05]<br>Asn160[2.89] | Trp111[3.03]<br>Asn160[2.90]               |
| ZINC04286774        | 1        | -10.9[15]                                   | -11.0[19]        | -11.0[17]        | -11.0[13]        | -11.0[18]        | Trp111[2.92]                               | Trp111[2.93]                               | Trp111[2.92]                               | Trp111[2.92]                                 | Trp111[2.93]                               |
| ZINC57967803        | 1        | -10.8[20]                                   | -10.8[15]        | -10.8[15]        | -10.8[14]        | -10.7[18]        | His110[2.81]                               | His110[2.86]                               | His110[3.05]                               | His110[2.83]                                 | His110[2.80]                               |
| ZINC08650109        | 1        | --                                          | --               | -10.7[20]        | --               | --               | --                                         | --                                         | Nil                                        | --                                           | --                                         |
