# Supplementary material for: Prospecting for Novel Plant-Derived Molecules of Rauvolfia serpentina as Inhibitors of Aldose Reductase, a Potent Drug Target for Diabetes and Its Complications
Source: PubMed Central journal article supplement (PMC3629236; doi:10.1371/journal.pone.0061327), 2013-04-17
Supplement: pone.0061327.s008.pdf [file pone.0061327.s008.pdf]

**Table S6. Sixteen indole alkaloids obtained by screening structural analogs of two PDM leads. A total of 16 ZINC leads were identified as potential ARIs by ligand-based screening of 22 structural analogs of the PDM leads (indobine and indobinine).**

| ZINC_ID                                                       | IUPAC                                              | STRUCTURE                                                                            |
|---------------------------------------------------------------|----------------------------------------------------|--------------------------------------------------------------------------------------|
| <b>Leads obtained from the analogs of indobine (RASE0048)</b> |                                                    |                                                                                      |
| ZINC08650120                                                  | benzyl 3-(1H-indol-3-yl)propanoate                 | 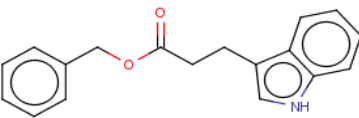   |
| ZINC04286938                                                  | (3-methylphenyl)methyl 3-(1H-indol-3-yl)propanoate |    |
| ZINC08650118                                                  | (4-cyanophenyl)methyl 3-(1H-indol-3-yl)propanoate  |    |
| ZINC04286771                                                  | (4-fluorophenyl)methyl 3-(1H-indol-3-yl)propanoate |   |
| ZINC08650121                                                  | (4-bromophenyl)methyl 3-(1H-indol-3-yl)propanoate  |  |
| ZINC04286761                                                  | (4-chlorophenyl)methyl 3-(1H-indol-3-yl)propanoate |  |
| ZINC03457470                                                  | (2-fluorophenyl)methyl 3-(1H-indol-3-yl)propanoate |  |
| ZINC04286496                                                  | (3-cyanophenyl)methyl 3-(1H-indol-3-yl)propanoate  |  |

|                                                                 |                                                         |  |
|-----------------------------------------------------------------|---------------------------------------------------------|--|
| ZINC03273473                                                    | (3-chlorophenyl)methyl 3-(1H-indol-3-yl)propanoate      |  |
| ZINC08649692                                                    | (3-fluorophenyl)methyl 3-(1H-indol-3-yl)propanoate      |  |
| <b>Leads obtained from the analogs of indobinine (RASE0049)</b> |                                                         |  |
| ZINC14517206                                                    | cyclohexyl 3-(1H-indol-3-yl)propanoate                  |  |
| ZINC66777292                                                    | (1R,3S)-3-methoxycyclohexyl 3-(1H-indol-3-yl)propanoate |  |
| ZINC49016166                                                    | cyclopentyl 3-(1H-indol-3-yl)propanoate                 |  |
| ZINC04286775                                                    | (1S)-2-oxocyclohexyl 3-(1H-indol-3-yl)propanoate        |  |
| ZINC04286774                                                    | (1R)-2-oxocyclohexyl 3-(1H-indol-3-yl)propanoate        |  |
| ZINC57967803                                                    | (2S)-oxan-2-ylmethyl 3-(1H-indol-3-yl)propanoate        |  |
