# Supplementary material for: Prospecting for Novel Plant-Derived Molecules of Rauvolfia serpentina as Inhibitors of Aldose Reductase, a Potent Drug Target for Diabetes and Its Complications
Source: PubMed Central journal article supplement (PMC3629236; doi:10.1371/journal.pone.0061327), 2013-04-17
Supplement: pone.0061327.s009.pdf [file pone.0061327.s009.pdf]

**Table S7. Hydrogen bonding pattern with critical residues (for representative ZINC leads).** Details of critical interactions during MD simulations at every 0.5ns.

| <b>ZINC Leads</b> | <b>0.5ns</b>     | <b>1.0ns</b> | <b>1.5ns</b> | <b>2.0ns</b>     | <b>2.5ns</b> | <b>3.0ns</b> | <b>3.5ns</b> | <b>4.0ns</b> | <b>4.5ns</b> | <b>5.0ns</b> |
|-------------------|------------------|--------------|--------------|------------------|--------------|--------------|--------------|--------------|--------------|--------------|
| ZINC04286771      | Ser302<br>His110 | --           | His110       | --               | His110       | His110       | His110       | His110       | His110       | His110       |
| ZINC49016166      | His110<br>Cys298 | His110       | --           | His110<br>Cys298 | His110       | His110       | His110       | His110       | His110       | His110       |
